# 1 Collagen (I) homotrimer does not cause bone fragility but potentiates the 2 osteogenesis imperfecta (oim) mutant allele

3  
4 Katie J. Lee <sup>a</sup>, Lisa Rambault <sup>b</sup>, George Bou-Gharios <sup>a</sup>, Peter D. Clegg <sup>a,c</sup>, Riaz Akhtar <sup>d</sup>,  
5 Gabriela Czanner <sup>e</sup>, Rob van 't Hof <sup>a</sup>, Elizabeth G. Canty-Laird <sup>a,c</sup>

6  
7 <sup>a</sup> Department of Musculoskeletal and Ageing Science, Institute of Life Course and Medical Sciences,  
8 University of Liverpool, William Henry Duncan Building, 6 West Derby Street, Liverpool, L7 8TX, United  
9 Kingdom

10 <sup>b</sup> Université de Poitiers, France

11 <sup>c</sup> The Medical Research Council Versus Arthritis Centre for Integrated Research into Musculoskeletal  
12 Ageing (CIMA)

13 <sup>d</sup> Department of Mechanical, Materials and Aerospace Engineering, School of Engineering, University  
14 of Liverpool, L69 3GH, United Kingdom

15 <sup>e</sup> Department of Applied Mathematics, Faculty of Engineering and Technology, Liverpool John Moores  
16 University, Byrom Street, Liverpool, L3 3AF, United Kingdom

## 17 18 19 **Abstract**

20  
21 Type I collagen is the major structural component of bone where it exists as an  $(\alpha 1)_2(\alpha 2)_1$  heterotrimer  
22 in all vertebrates. The oim mouse model comprising solely homotrimeric  $(\alpha 1)_3$  collagen-1, due to a  
23 dysfunctional  $\alpha 2$  chain, has a brittle bone phenotype implying that the heterotrimeric form is required  
24 for physiological bone function. However, humans with null alleles preventing synthesis of the  $\alpha 2$   
25 chain have connective tissue and cardiovascular abnormalities (cardiac valvular Ehlers Danlos  
26 Syndrome), without evident bone fragility. Col1a2 null and osteogenesis imperfecta (oim) mouse lines  
27 were used in this study and bones analysed by microCT and 3-point bending. RNA was also extracted  
28 from heterozygote tissues and allelic discrimination analyses performed using qRT-PCR. Here we show  
29 that mice lacking the  $\alpha 2(I)$  chain do not have impaired biomechanical or bone structural properties,  
30 unlike oim homozygous mice. However Mendelian inheritance was affected in male mice of both lines  
31 and male mice null for the  $\alpha 2$  chain exhibited age-related loss of condition. The brittle bone phenotype  
32 of oim homozygotes could result from detrimental effects of the oim mutant allele, however the  
33 phenotype of oim heterozygotes is known to be less severe. We used allelic discrimination to show  
34 that the oim mutant allele is not downregulated in heterozygotes. We then tested whether gene  
35 dosage was responsible for the less severe phenotype of oim heterozygotes by generating compound  
36 heterozygotes. Data showed that compound heterozygotes had impaired bone structural properties  
37 as compared to oim heterozygotes, albeit to a lesser extent than oim homozygotes. Hence, we  
38 concluded that the presence of heterotrimeric collagen-1 in oim heterozygotes alleviates the effect of  
39 the oim mutant allele but a genetic interaction between homotrimeric collagen-1 and the oim mutant  
40 allele leads to bone fragility.

41  
42 **Key words:** collagen, homotrimer, Col1a2,  $\alpha 2(I)$ , osteogenesis imperfecta, cvEDS

## 44 Introduction

45

46 Type I collagen is the major structural component of vertebrate tissues, where it exists as insoluble  
47 fibrils formed from arrays of trimeric collagen molecules. In tetrapods, type I collagen molecules are  
48 predominantly  $(\alpha 1)_2(\alpha 2)_1$  heterotrimers derived from the polypeptide gene products of the Col1a1  
49 and Col1a2 genes. Trimeric type I procollagen molecules contain a central triple-helical domain  
50 flanked by globular N- and C-propeptide regions, that are proteolytically removed to facilitate  
51 fibrillogenesis (Canty and Kadler, 2005). Procollagen molecules are synthesised in the endoplasmic  
52 reticulum of the secretory pathway where individual molecules first associate via the C-propeptides.  
53 C-propeptide association facilitates chain registration and folding of the triple helical domain into a  
54 right-handed triple helix. The type-specific assembly of fibrillar procollagens has been attributed to  
55 defined amino acid sequences within the C-propeptide including a chain recognition sequence (Lees  
56 et al., 1997), specific stabilising residues (Sharma et al., 2017) and a cysteine code (DiChiara et al.,  
57 2018), although none fully explain the preferential heterotrimerisation of type I procollagen.

58 Abnormal type I collagen  $(\alpha 1)_3$  homotrimer, derived from COL1A1 alone, is genetically or  
59 biochemically associated with common age-related human diseases including osteoporosis (Ralston  
60 et al., 2006), osteoarthritis (Bailey et al., 2002; Kerns et al., 2014; Philp et al., 2017), intervertebral  
61 disc degeneration (Zhong et al., 2017), arterial stiffening (Brull et al., 2001), cancer (Makareeva et al.,  
62 2010), liver fibrosis (Rojkind et al., 1979) and Dupuytren's contracture (Ehrlich et al., 1982). The  
63 homotrimeric form is resistant to mammalian collagenases (Han et al., 2010) and alterations in  
64 collagen crosslinking have been reported in the osteogenesis imperfecta murine (oim) model, which  
65 lacks a functional  $\alpha 2(I)$  chain (Carriero et al., 2014; Pfeiffer et al., 2005; Sims et al., 2003). Hence the  
66 presence of homotrimeric collagen (I) in human disease may alter the ability of tissues to respond to  
67 changing physiological demands by slowing remodelling and altering tissue mechanics.

68 The oim mutation is a deletion of a single guanidine residue, causing a frameshift that alters  
69 the last 47 amino acids and adds an additional residue to the  $\alpha 2$  chain of type I procollagen (Fig. 1A).  
70 The mutant  $\alpha 2$  chain cannot be incorporated into trimers hence giving rise to solely homotrimeric  
71 collagen-1 in oim homozygotes. Homozygous oim/oim mice have osteopenia, progressive skeletal  
72 deformities, spontaneous fractures, cortical thinning and small body size (Chipman et al., 1993) with  
73 corresponding alterations to bone structure and material properties. (Carleton et al., 2008; Grabner  
74 et al., 2001). Homozygous oim mice also have a reduced circumferential breaking strength and  
75 greater compliance of aortae (Pfeiffer et al., 2005; Vouyouka et al., 2001), reduced ultimate stress  
76 and strain tendon for tendon (Misof et al., 1997) and kidney glomerulopathy (Phillips et al., 2002).

77 The oim mutation is very similar to the first-identified mutation causing human osteogenesis  
78 imperfecta (autosomal recessive Silence type III), in which a 4 nucleotide deletion (c.4001\_4004del)  
79 causes a frameshift (p.(Asn1334Serfs\*34)) to alter the last 33 amino acids of the  $\alpha 2$  chain of type I  
80 procollagen (Pihlajaniemi et al., 1984). The human mutation also results in homotrimeric type I  
81 collagen synthesis as the defective  $\alpha 2(I)$  chain cannot be incorporated into trimers (Nicholls et al.,  
82 1984; Nicholls et al., 1979). In two additional patients with mild osteogenesis imperfecta, novel  
83 mutations were identified causing a 48 amino acid truncation of the  $\alpha 2$  chain and a substitution of a  
84 cysteine residue important for interchain disulphide bonding respectively (Pace et al., 2008). In these  
85 cases the  $\alpha 2$  chain was again synthesised but not incorporated into trimers. A similar mutation  
86 causing severe osteogenesis imperfecta in a Beagle dog was caused by a heterozygous 9 nucleotide

87 replacement of a 4 nucleotide stretch, leading to a 37 residue truncation of the  $\alpha 2$  chain and  
88 alteration of the final 44 amino acids of the truncated polypeptide (Campbell et al., 2001).

89 Oim heterozygotes do not show spontaneous fractures but appear to have a bone  
90 phenotype intermediate between that of wild-type and homozygous mice (Camacho et al., 1999;  
91 Grabner et al., 2001; Saban et al., 1996; Yao et al., 2013). Similarly the parents of the human  
92 proband had no history or evidence of fractures but had a marked decrease in bone mass (Prockop,  
93 1988).

94 The osteogenesis imperfecta brittle bone phenotype contrasts with the phenotype of human  
95 patients in which mutations leading to nonsense-mediated decay of the COL1A2 mRNA cause a  
96 specific cardiac valvular form of Ehlers-Danlos syndrome (cv-EDS) (Guarnieri et al., 2019; Malfait et  
97 al., 2006). EDS is generally characterised by hyperextensible skin and joint hypermobility. In cv-EDS  
98 patients the  $\alpha 2$  chain of type I collagen is not synthesised, therefore all type I collagen molecules  
99 would be homotrimeric. It has been hypothesised that the phenotypic differences between the  
100 patients could be explained by the cellular stress elicited by the presence of misfolded  $\alpha 2(I)$   
101 procollagen chains in osteogenesis imperfecta (Forlino et al., 2011; Makareeva et al., 2011; Pace et  
102 al., 2008), having a particularly detrimental effect on bone. Cellular stress has been implicated in  
103 human osteogenesis imperfecta caused by substitutions in the C-propeptide of the  $\alpha -1(I)$  chain  
104 (Chessler and Byers, 1993), in mouse models of triple-helical region mutations; Aga2 (90 a.a.  
105 extension to the  $\alpha 1(I)$  chain) (Lisse et al., 2008), Brl IV (G349C in  $\alpha 1(I)$ ) (Forlino et al., 2007) and  
106 Amish (G610C in  $\alpha 2(I)$ ), identical to that found in a human kindred (Mirigian et al., 2016), as well as  
107 in the zebrafish model Chihuahua (G574D in  $\alpha 1(I)$ ) (Gioia et al., 2017).

108 In this study we compared the bone phenotype of the oim model to that of a Col1a2 null  
109 mouse. We considered that comparing the oim model to that of a Col1a2 null line provided a unique  
110 opportunity to distinguish between the intracellular and extracellular effects of a collagen mutation  
111 linked to brittle bone disease, as well as to elucidate the effect of collagen (I) homotrimer on bone  
112 structure and biomechanics. Specifically, we compared the bone phenotype of oim homozygous and  
113 heterozygous mutant mice with that of mice containing 1 or 2 copies of a targeted Col1a2 null allele  
114 and wild-type controls, in order to determine the contribution of collagen (I) homotrimer to bone  
115 fragility.

116  
117

## 118 **Materials and Methods**

119

### 120 **Mouse models**

121 A Col1a2 knock-out mouse line (Col1a2<sup>tm1b(EUCOMM)Wtsi</sup>, C57BL/6N) (Col1a2 null, N) and osteogenesis  
122 imperfecta mouse line (Col1a2<sup>oim</sup>, C57BL/6J) (oim, J) were used to investigate the effects of the  
123 absence and the mis-folding of the  $\alpha 2(I)$  polypeptide chain respectively (Fig. 1B). The  
124 Col1a2<sup>tm1b(EUCOMM)Wtsi</sup> line was derived from Col1a2<sup>tm1a(EUCOMM)Wtsi</sup>, purchased from the Mutant Mouse  
125 Resource and Research Centre (MMRRC) at UC Davies, by Cre-mediated recombination (Skarnes et  
126 al., 2011) during IVF provided by MRC Harwell. The Col1a2<sup>oim</sup> line was a kind gift from Prof. Charlotte  
127 Phillips, University of Missouri and was subsequently rederived using Charles River (Massachusetts,  
128 USA) services. Mice were housed at the University of Liverpool in a specific pathogen free unit in  
129 groups of up to 5 by litter, with oim homozygotes and Col1a2 null/oim heterozygotes housed  
130 separately after weaning. Food and water were supplied *ad libitum* and wet food was supplied to  
131 oim homozygotes and Col1a2 null/oim heterozygotes due to fragile teeth. Cage balconies were

132 removed for oim homozygotes and Col1a2 null/oim heterozygotes to reduce fracture risk and non-  
133 tangling bedding was supplied as standard for all mice. The mice were housed at 20-24°C and 45-  
134 65% humidity with a 12 hour light/dark cycle. All breeding and maintenance of animals was  
135 performed under project licences PP4874760 and P92F55CB2, in compliance with the Animals  
136 (Scientific Procedures) Act 1986 and UK Home Office guidelines. Details of all animals were recorded  
137 on tick@lab (a-tune) laboratory animal management software (Darmstadt, Germany), including  
138 health and treatment reports. Genotyping was carried out using Transnetyx (Tennessee, USA)  
139 services using the 'Col1a2-2 WT' probe with 'LAC Z' or 'L1L2-Bact-P TA' for tm1a allele or 'L1L2 tm1b'  
140 for tm1b allele, and the 'oim' probe for the oim line. Blinding was carried out by processing mice and  
141 labelling samples according to the mouse number, rather than genotype. Wild-type (N +/+, J +/+),  
142 heterozygote (N +/-, J +/-) and homozygote (N -/-, J oim/oim) mice were sacrificed at 8 (±3 days)  
143 and 18 (±3 days) weeks for analysis as well as 52 weeks (±8 days) for the Col1a2 null line. Eight and  
144 18 weeks were chosen as the time points at which long bone growth and bone mineralisation  
145 respectively are complete. Oim mice were not maintained up to 52 weeks due to welfare  
146 considerations for homozygotes exhibiting spontaneous fractures. Cross-breeding of both lines was  
147 also performed (Col1a2 null/oim, mixed background) and wild-type (+/+), Col1a2 null heterozygote  
148 (+/oim), oim heterozygote (+/-) and compound heterozygote (-/oim) mice were sacrificed at 8  
149 weeks.

150

#### 151 **Mouse dissection**

152 Mice were culled using a rising carbon dioxide concentration method in an automated CO<sub>2</sub> delivery  
153 chamber. After confirmation of the permanent cessation of the circulation, the mice were weighed  
154 and the tail was removed at the base and added to PBS for further dissection. Next, the skin was  
155 removed, the femoral heads displaced from the acetabulum and the entire hind limbs detached and  
156 added to PBS. The skin was then removed from the tail and the tail tendons dissected free. Excess  
157 muscle was removed from the hind limbs and the feet removed at the tarsus. For techniques  
158 requiring isolated tendon and bone tissue, the patellar tendon was further removed, the femur and  
159 tibia separated, and all muscle dissected out.

160

#### 161 **Pulse-chase with <sup>14</sup>C-L-proline**

162 Tail tendon, patellar tendon and femur tissue was dissected from 8 week old Tm1b mice. Tissue was  
163 dissected into small pieces and added to DMEM containing penicillin/streptomycin (1% v/v), L-  
164 glutamine (2 mM), L-ascorbic acid 2-phosphate (200 μM), β-aminopropionitrile (400 μM) and 2.5  
165 μCi/ml [<sup>14</sup>C]proline (GE Healthcare) and incubated at 37°C for 18 hours. The tissue samples were  
166 subsequently moved to media without [<sup>14</sup>C]proline for 3 hours. Collagen was then extracted from  
167 the tissue samples using a salt extraction buffer (1 M NaCl, 25 mM EDTA, 50 mM Tris-HCl, pH 7.4)  
168 containing protease inhibitors (Roche, Basel, Switzerland). Samples were extracted overnight at 4°C  
169 with agitation. Extracts were analysed by electrophoresis on 6% Tris-Glycine gels (ThermoFisher,  
170 Massachusetts, USA) with delayed reduction (Sykes et al., 1976). The gels were fixed (10%  
171 methanol, 10% acetic acid), dried under vacuum, and exposed to a phosphorimaging plate (BAS-IP  
172 MS). Phosphorimaging plates were processed using a phosphorimager (Typhoon FLA7000 IP) and  
173 densitometry carried out using ImageQuant software (GE Healthcare Life Sciences, Illinois, USA).

174

175

176

### 177 **Three point bending**

178 Before three-point bending tests, the freshly isolated intact femurs and tibiae (only those showing no  
179 evidence of fracture calluses) were imaged using  $\mu$ CT in order to obtain the cross-sectional area,  
180 circumference and moment of inertia measurements. Bones were scanned inside 1 ml syringes in  
181 PBS using a Skyscan 1272 scanner (Bruker, Kontich, Belgium). Scans were performed at a resolution  
182 of 9  $\mu$ m (60 kV, 150  $\mu$ A, 2x2 binning, rotation step size 0.5°, using a 0.5 mm aluminium filter). Scans  
183 were reconstructed using NRecon (Bruker) using Gaussian smoothing of 1, ring artefact reduction 5,  
184 and beam hardening compensation at 38%. For analysis of cortical bone parameters, a region of  
185 interest of 200 slices of the mid-femur and mid-tibia was selected and saved using Dataviewer  
186 (Bruker). Cross-sectional area, circumference and moment of inertia as well as bone density  
187 measurements were obtained using a custom macro in CTan (Bruker). Density measurements were  
188 calibrated using a set of hydroxyapatite phantoms (Bruker, Kontich, Belgium).

189 A Zwickline Fmax 1 kN (Zwick, Ulm, Germany) biomechanical tester fitted with a 50N load  
190 cell was used for three-point bending experiments. Femurs and tibiae were loaded at a span length  
191 of 8 mm and the crosshead was lowered at a rate of 0.5 mm/min using testXpert II software (Zwick).  
192 Ultimate force and stiffness measurements were calculated from the force-displacement curve, at  
193 the point of maximum load and the maximum gradient of the linear rising section of the graph  
194 respectively. The maximum stiffness was calculated using equation 1.1 and elastic modulus by  
195 equation 1.2.

196

197 **Eq. 1.1**            Stress = ultimate force x ((span x radius) / 4 x moment of inertia))

198

199 **Eq. 1.2**            Elastic modulus = (stiffness x span)<sup>3</sup> / 48 x moment of inertia

200

### 201 **Micro computed tomography ( $\mu$ CT)**

202 Hind limbs were fixed overnight in 10% neutral buffered formalin before washing and storage in 70%  
203 ethanol. Limbs were loaded into 2 ml syringe tubes in 70% ethanol and scanned using a Skyscan  
204 1272 scanner (Bruker, Kontich, Belgium) at a resolution of 4.5  $\mu$ m (60 kV, 150  $\mu$ A, no binning,  
205 rotation step size 0.3°, using a 0.5 mm aluminium filter). Scans were reconstructed using NRecon  
206 software (Bruker) as described above. Trabecular bone parameters of the proximal tibia were  
207 measured in a volume, selected and saved using Dataviewer (Bruker), of 200 slices starting 20 slices  
208 distal to the growth plate as described {van 't Hof, 2019 #3510. As previously, only bones that did  
209 not contain any fracture calluses were used. Trabecular bone parameters were measured using a  
210 custom macro in CTan (Bruker).

211

### 212 **Allelic discrimination**

213 RNA was extracted from tissues preserved in RNAlater by firstly applying Trizol to samples which were  
214 then homogenised using a steel ball lysing matrix and a FastPrep 24 tissue homogeniser (MP  
215 Biomedicals, California, USA). RNA was extracted from homogenised samples using a Direct-Zol RNA  
216 kit (Zymo Research, California, USA) as per the manufacturer's instructions. The quantity and quality  
217 of RNA was assessed using a NanoDrop spectrophotometer (Thermo Fisher), 260/280 values between  
218 1.8-2.1 were deemed of a sufficient RNA quality. cDNA was synthesised in a 25  $\mu$ l reaction from 0.5-1  
219  $\mu$ g of total RNA. The conditions for cDNA synthesis were: incubation at 5 minutes at 70°C, 60 minutes  
220 at 37°C and 5 minutes at 93°C with 1 U/ $\mu$ l RNasin ribonuclease inhibitor, 2 mM PCR nucleotide mix, 8  
221 U/ $\mu$ l M-MLV reverse transcriptase and 0.02  $\mu$ g/ $\mu$ l random-hexamer oligonucleotides per reaction.

222 Detection of murine Col1a2 wild-type and mutant alleles was performed using a custom snpsig™  
223 real-time PCR mutation detection/allelic discrimination kit (Primerdesign, Southampton, UK). 10 ng  
224 of cDNA was added to 10 µl of PrecisionPLUS mastermix (Primerdesign), 1 µl of the custom  
225 genotyping primer/probe mix and 4 µl nuclease free water per reaction. Amplification was  
226 performed on a Stratagene qPCR machine with an initial enzyme activation step of 2 minutes at 95°C  
227 followed by 10 cycles of denaturation for 10 seconds at 95°C and extension for 60 seconds at 60°C.  
228 Finally, 35 cycles of denaturation for 10 seconds at 95°C and extension for 60 seconds at 68°C, with  
229 fluorogenic data collected during this extension step for the ROX (wild type) and VIC (oim) channels.

230

### 231 **Statistical analysis**

232 Sample size calculations were carried out using G\*Power 3.1.9.2 and Stata13 to give a power of at  
233 least 90% at the 5% level of significance. Primary outcomes were defined as bone stiffness (N/mm),  
234 bone volume (%) and trabecular separation (µm) with a standardised effect size of 2 deemed to be  
235 biologically important. For comparison, effect sizes were calculated from previously reported oim  
236 data (Vanleene et al., 2011) as -2.0 (41%) for femur stiffness, -2.8 (48%) for bone volume and 2.8  
237 (66%) for trabecular separation. Comparison of 'bone mineral density' (DEXA) effect sizes for the oim  
238 (Phillips et al., 2000) and Col1a2 null lines (IMPC) at 14 wks indicated effect sizes of a similar  
239 magnitude (d=-1.6 and 1.7 respectively). Group sizes of 3 were calculated for two-way ANOVA on  
240 normally distributed data to test the effect of genotype (Stata13). The sample size in each group was  
241 increased by 20% to allow for non-normality of the data to give planned group sizes of 4.

242 All statistical analysis was completed using SigmaPlot software. Comparisons of continuous  
243 measurements across sex and genotype were carried out using a two-way ANOVA with a Holm-Sidak  
244 post-hoc test. Continuous data failing a Shapiro-Wilk test were transformed using LOG10  
245 transformation prior to analysis. For continuous data still failing a Shapiro-Wilk test after  
246 transformation a nonparametric Kruskal-Wallis H test on ranks with a Dunn's post-hoc test was used  
247 for comparisons. Comparisons of two categorical variables were done via a Chi-squared test with the  
248 expected counts in each cell of the table being at least 5. The time to deterioration data were  
249 summarised via survival curves and statistically compared via a log-rank (Mantel-Cox) test, overall p-  
250 value is reported. Data were plotted using GraphPad Prism 8.

251

252

## 253 **Results**

254

### 255 **Tm1b homozygotes lack the α2(I) collagen chain in bone and tendon**

256 To verify lack of the α2(I) chain in tm1b homozygotes, tendon and bone samples from 8 week old  
257 mice were labelled with [14C]proline to detect newly synthesised collagen (I). SDS-PAGE analysis of  
258 labelled tissue extracts verified lack of α2(I) chain synthesis in tail tendon, bone and patellar tendon  
259 (Fig. 1C).

260



265 indicates amino acid sequence changed from that shown due to frameshift caused by the oim or  
266 equivalent mutation. + indicates additional amino acid. Strike-through indicates truncation. B:  
267 Genetic differences between the oim and Col1a2 null lines with implications for collagen (I) protein  
268 synthesis. Arrows indicate COL1 genes; N indicates mutation, light red box indicates null allele.  
269 Folded heterotrimeric proteins are indicated in black and red, whilst homotrimers are in black only.  
270 The presence of unincorporated mutant Col1a2 allele is indicated as a red waveform with a mutation  
271 (N). C: Tendon and bone tissue from Tm1b wild-type (+/+) and homozygote (-/-) mice were labelled  
272 with [14C]proline and analysed by delayed reduction SDS-PAGE. No labelled  $\alpha 2(I)$  chain was present  
273 in tm1b homozygotes (-/-) unlike in wild-type controls (+/+) indicating that tm1b homozygotes are  
274 Col1a2 null. S; collagen standard.  $\alpha 1(I)$  and  $\alpha 2(I)$  chains are indicated.

275

276

### 277 **Alterations to Mendelian inheritance in male mice of the oim and Col1a2 null lines**

278 To determine if either the oim or Col1a2 alleles resulted in loss of mice prior to weaning, a chi-  
279 squared test was performed on genotype data for Col1a2 null and oim mice. There were significant  
280 differences between the observed and expected genotype percentages for male mice of both lines  
281 (oim;  $p=0.01$ , Col1a2 null;  $p=0.033$ ), whereas no differences were seen for female mice of either line  
282 (Fig. 2 A-B). The data supported Mendelian inheritance in female mice, whereas increased numbers  
283 of male wild-types and reduced numbers of male heterozygotes were observed for both lines. A  
284 small reduction in the numbers of male homozygous oim mice was noted.

285

### 286 **Spontaneous fractures were observed solely in oim homozygotes, whilst male Col1a2 null 287 homozygotes exhibited mild joint swelling.**

288 During colony maintenance it was noticeable that spontaneous fractures occurred in the oim line,  
289 but not in the Col1a2 null line. Mildly swollen ankle joints were however observed in male tm1b  
290 mice which was initially attributed to fighting. The proportion of mice with swollen joints, or  
291 noticeable fractures with swelling were determined, including those requiring analgesia (Fig. 2 C-D).  
292 Male mice demonstrated a more severe phenotype than female mice for both the Col1a2 null and  
293 oim lines. For the oim line fractures and associated swelling were observed in homozygous mice  
294 only, with an incidence of 47% for males (20 out of 43) and 20% (10 out of 50) for females. 26% of  
295 male mice (11 out of 43) and 18% of female mice (9 out of 50) received analgesic medication.  
296 Swollen joints alone presented in 6% of male oim heterozygotes (5 out of 89), 2% of male oim  
297 homozygotes (1 out of 43) and 2% of female oim homozygotes (1 out of 50). For the Col1a2 null line  
298 no bone fractures were observed and no analgesia was required to be administered. Swollen joints  
299 were observed predominantly in male homozygotes with an incidence of 23% (19 out of 83). Less  
300 than 4% of male wild-type (4 out of 103), heterozygous (4 out of 126) and female homozygous (1 out  
301 of 56) mice presented with swollen joints. No female wild-type or heterozygous mice were reported  
302 to have swollen joints. For mouse weights recorded after euthanasia at 18 weeks, male oim  
303 homozygotes were significantly lighter than wild-types ( $p<0.001$ ) and heterozygotes ( $p<0.001$ ),  
304 whilst female wild-types were significantly heavier than heterozygotes ( $p=0.024$ ) and homozygotes  
305 ( $p<0.001$ ) (Fig. 2E). In contrast, there was no difference in weight between genotypes for the  
306 Col1a2 null line (Fig. 2F).

307

308



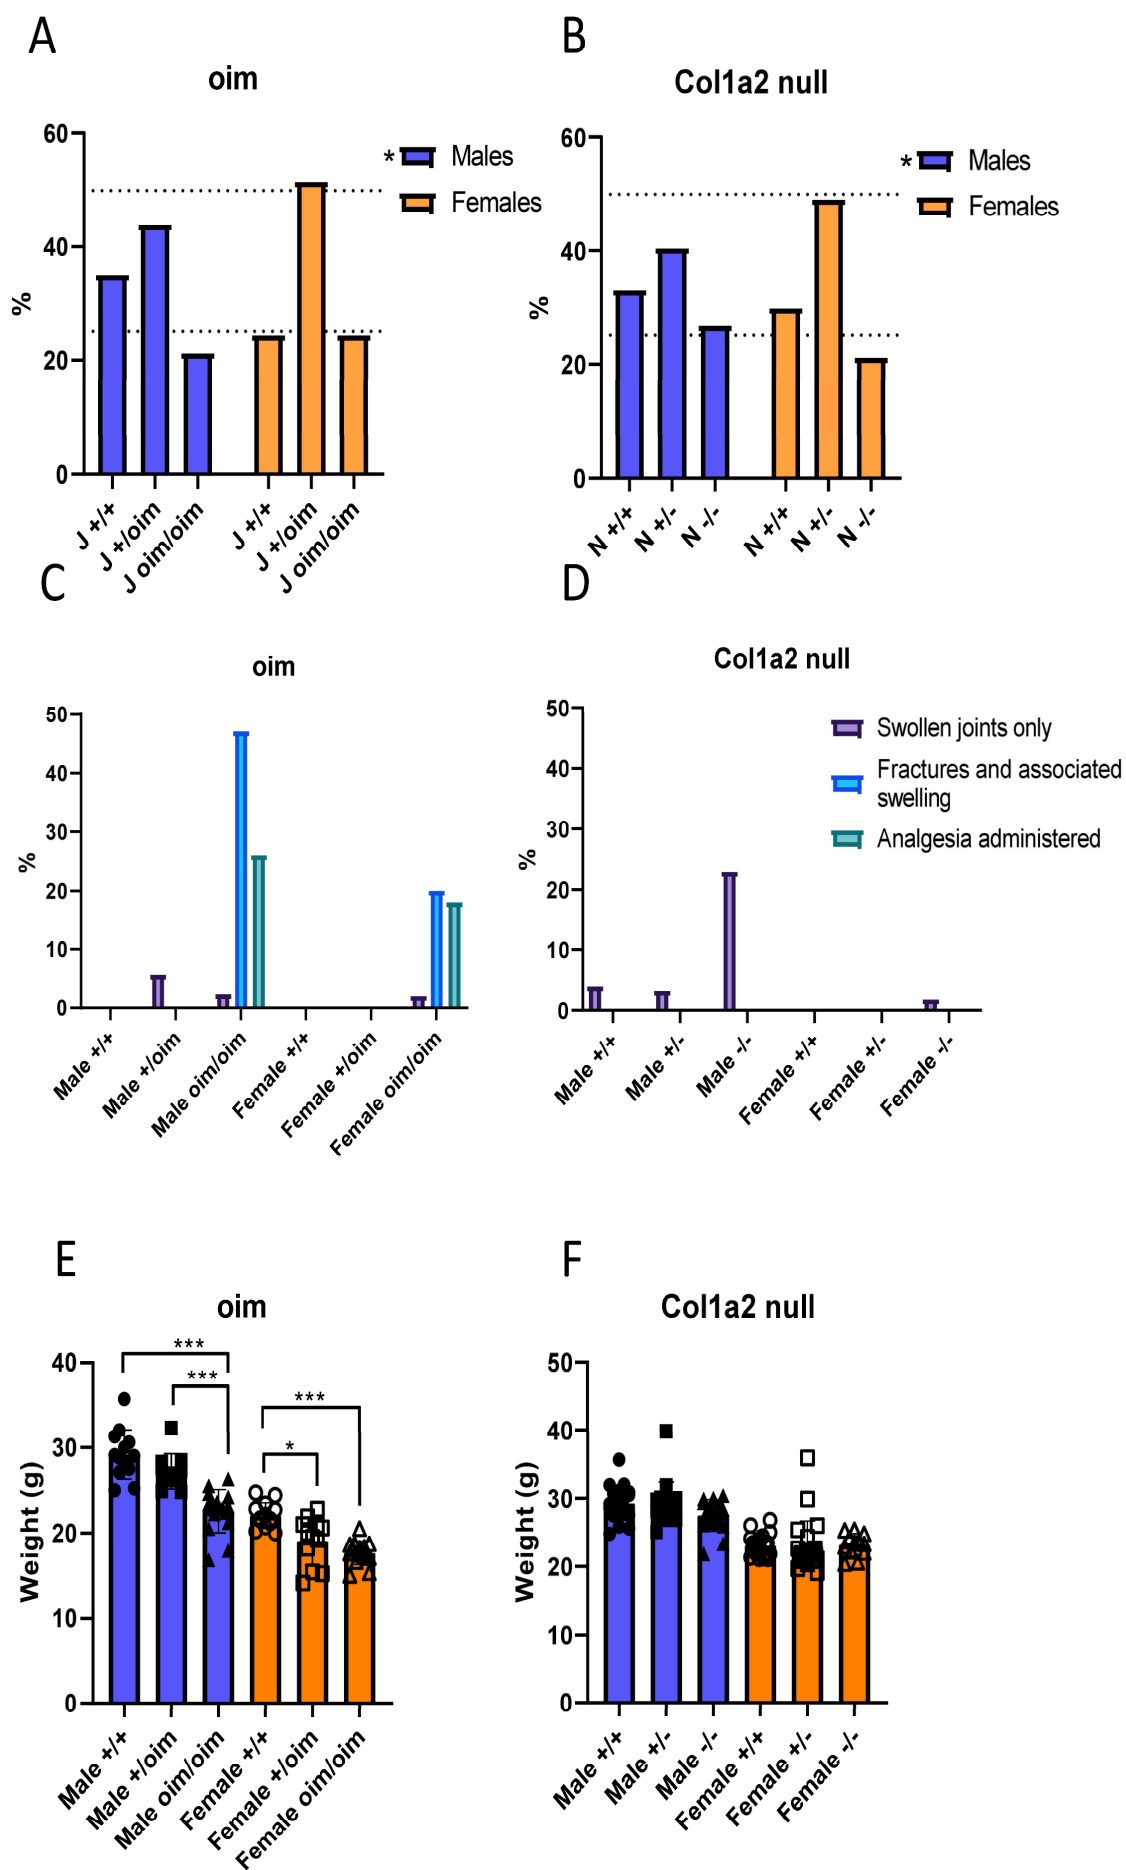

310 **Figure 2. Inheritance pattern, musculoskeletal health summary and mouse weights for the oim and**

311 **Col1a2 null lines.** A-B: The percentage of mice of each genotype born to heterozygous parents for

312 the oim (A) and Col1a2 null (B) lines. A chi-squared test showed significant differences between

313 observed and expected inheritance for male mice of both lines. C-D: The number of mice suffering

314 from swollen joints and bone fractures as well as those treated with analgesics were recorded for

315 the oim (C) and Col1a2 null (D) lines. These numbers are expressed as a percentage of total mouse

316 numbers. A-D: n=71, 89 and 43 for male oim +/+, +/- and oim/oim mice respectively; n=50, 106

317 and 50 for female oim +/+, +/- and oim/oim mice respectively; n= 103, 126 and 83 for male

318 Col1a2 null +/+, +/-, -/- mice respectively and; n=79, 130, 56 for female Col1a2 null +/+, +/-, -/- mice

319 respectively. Swollen joints were mild in the Col1a2 null line and often not noted until advanced age,

320 therefore the numbers shown above may be an underestimation due to many mice being culled at

321 earlier time points. E-F: Weights of 18 week oim (E) and Col1a2 null (F) mice measured after

322 euthanasia. Blue bars/filled shapes = males, orange bars/open shapes = females. \* = p-value < 0.05

323 and \*\*\* = p-value < 0.001. E: p-value for genotype < 0.001 for males and females. E-F: n= 13, 11 and

324 16 for male oim male +/+, +/- and oim/oim mice respectively, n=13, 12 and 15 for female oim +/+,

325 +/- and oim/oim mice respectively, n= 21, 17 and 17 for male Col1a2 null +/+, +/-, -/- mice

326 respectively, n=21, 22, 12 for female Col1a2 null +/+, +/-, -/- mice respectively.

327

328

329 **Three-point bending of bones from oim and Col1a2 null mice**

330 To determine whether extrinsic and intrinsic biomechanical properties of bones differed between

331 the Col1a2 null and oim lines, femurs and tibias from both male and female mice at various ages

332 were subjected to three-point bending to measure strength, stiffness, stress and elastic modulus

333 (Figs. 3&4).

334 Generally, at 8 weeks of age, bones from oim homozygote animals showed a reduction in

335 strength. Femurs from oim male homozygotes showed a 47% and 43% decrease in strength (Fig. 3A)

336 and stiffness (Fig. 3B) respectively compared with wild-type controls, heterozygotes also

337 demonstrated a decrease in strength and stiffness compared to wild-type controls, however these

338 differences were not significant. A similar trend was seen in tibias from both males and females (Fig.

339 4 A&B), however, this was not statistically significant. Ultimate strength was also reduced by 50% in

340 femurs from homozygote females at this age (Fig. 3A), however, stiffness was not. There were no

341 significant differences in stress, elasticity or bone cross-sectional area between oim genotypes at 8

342 weeks of age (Fig.3&4 C-E).

343 At 18 weeks of age, there were no statistically significant differences in 3-point bending

344 parameters of the femur between the oim genotypes for female mice. However, ultimate stress was

345 significantly reduced by 65% in 18-week-old oim male homozygous compared to heterozygous or

346 wild-type femurs, whilst elastic modulus was 65% lower in oim homozygous than heterozygous

347 femurs, and 52% lower than wild-types (Fig.3 H&I). In the tibia ultimate strength, stiffness and cross

348 sectional area were significantly reduced in both male and female mice at this age. Although there

349 was a trend for ultimate strength and stiffness of the femur to be reduced as well, this was not

350 statistically significant (Fig.3 F, G).

351 Surprisingly, deletion of Col1a2 had only modest effects on 3-point bending parameters, and

352 only the ultimate strength and ultimate stress (in males at 18 weeks of age) and elastic modulus (in

353 males and females at 52 weeks of age) were affected. Ultimate strength of the tibia was decreased

354 by 35% in homozygous males compared to wild-type males (Fig. 4F), whilst ultimate stress was

355 decreased by 39% in homozygous as compared to heterozygote males (Fig.4H). Elastic modulus was  
356 increased by 38% in femurs from 52-week-old female Col1a2 null heterozygotes compared to  
357 homozygotes (Fig.3N), and increased by 24% in tibia of female heterozygotes compared to wild-type  
358 mice (Fig.4N). The elastic modulus was decreased by 26% in tibias from male Col1a2 null mice  
359 compared to WT mice at 52 weeks (Fig.4N).

360 Whilst the strain of the lines differs slightly (C57BL/6J versus C57BL/6N) similar trabecular  
361 bone parameters have been reported in both strains (Simon et al., 2013) and we observed no  
362 significant differences between wild-types of either strain. Results across lines are therefore  
363 comparable. For femur, oim heterozygotes had a significantly increased elastic modulus compared  
364 to Col1a2 null heterozygotes at 18 weeks (Fig.3I). Tibias from 8 week old mice showed increased  
365 stiffness in Col1a2 null male homozygotes compared to oim male homozygotes (Fig 4B). Stiffness  
366 was also reduced in oim heterozygotes and homozygotes compared to the Col1a2 null equivalents  
367 (Fig.4G). Cross-sectional area was reduced in oim homozygotes compared to Col1a2 null  
368 homozygotes. There were no significant differences in strength, stiffness, stress and bone cross-  
369 sectional area between genotypes at 52 weeks (Fig.4. K-M, O).

370

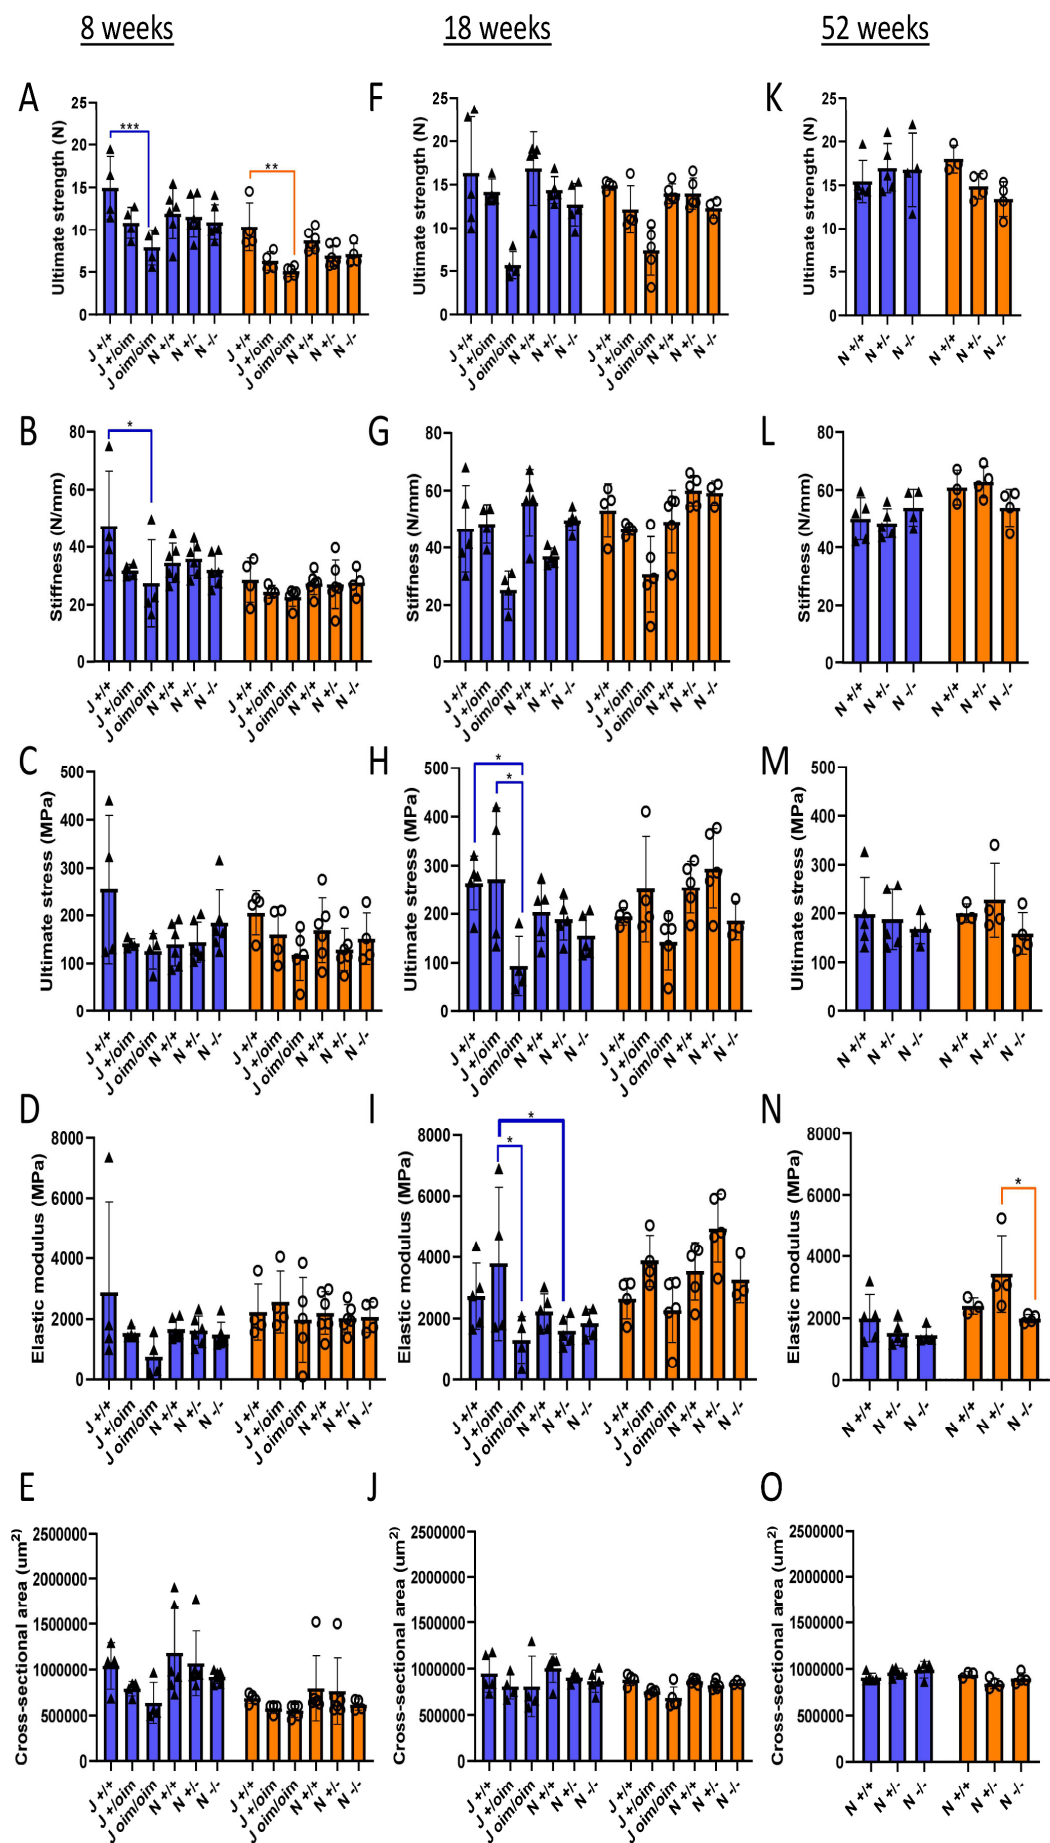

372 **Figure 3. Three-point bending of femurs from oim and Col1a2 null mice.** Femurs from oim and  
373 Col1a2 null mice were subjected to three-point bending at 8 (A-E), 18 (F-J) and 52 weeks (K-O).  
374 Ultimate strength (A, F, K) and stiffness (B, G, L) (extrinsic) measurements were normalised to cross-  
375 sectional area (E, J, O) to calculate ultimate stress (C, H, M) and elastic modulus (D, I, N) (intrinsic).  
376 Blue bars/triangles = males, orange bars/circles = females. Thin blue and orange bars show  
377 differences between genotypes and thick blue and orange bars show differences between mouse  
378 lines. \* = p-value < 0.05, \*\* = p-value < 0.01 and \*\*\* = p-value < 0.001. Overall significant p-values  
379 from two-way ANOVA tests were < 0.001 (genotype) and < 0.001 (sex) for A, 0.043 (genotype) and  
380 < 0.001 (sex) for B, 0.018 (genotype) for C, 0.001 (genotype) for H, 0.007 (genotype) and < 0.001 (sex)  
381 for I, 0.004 (sex) for L, 0.1 (genotype) and < 0.001 (sex) for N, 0.018 (sex) for O, whilst the overall p-  
382 values from Kruskal Wallis H tests were < 0.001 for E, 0.003 for F and < 0.001 for G. n=4 for all oim  
383 groups, except female J oim/oim and male 18 week J+/+ where n=5. n=6 for all Col1a2 null groups at  
384 8 weeks and n=5 for all Col1a2 null groups at 18 weeks. n=4 for all Col1a2 null groups at 52 weeks,  
385 except female +/- and male +/- where n=5 and male +/- where n=6.  
386

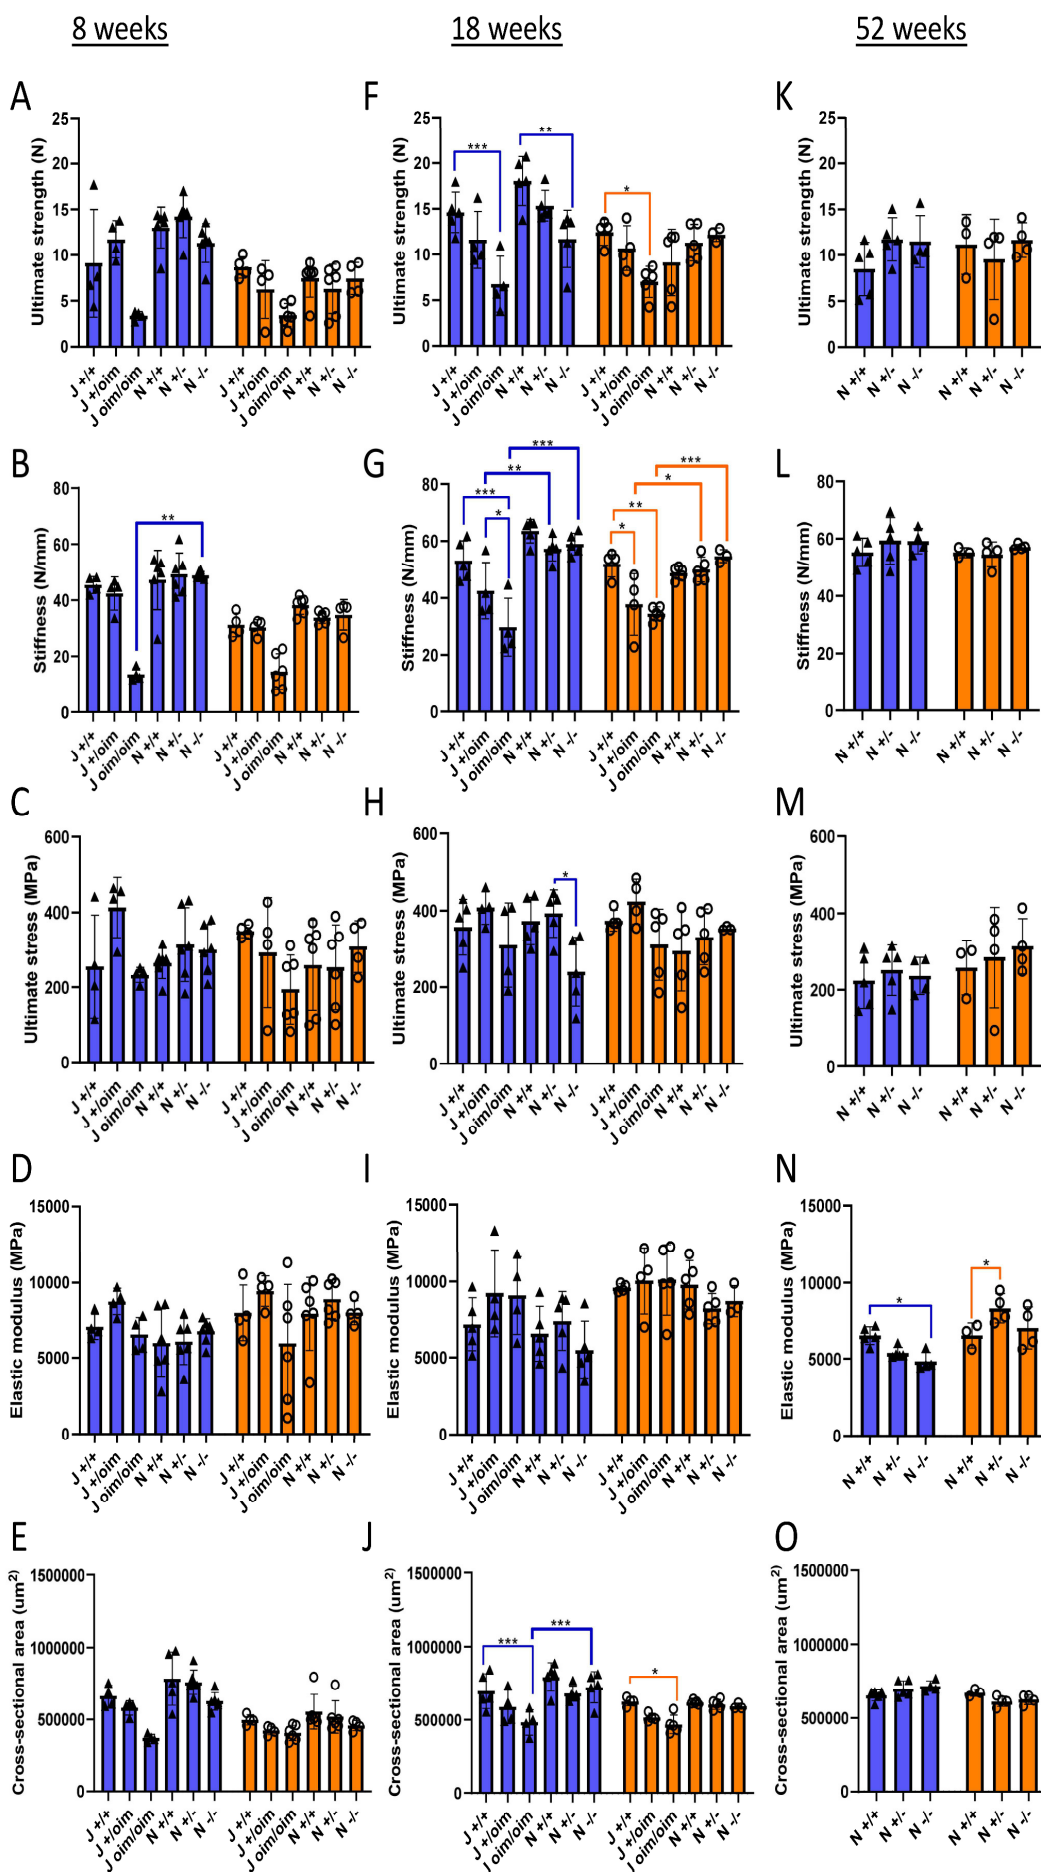

388 **Figure 4. Three-point bending of tibias from oim and Col1a2 null mice.** Tibias from oim and Col1a2  
389 null mice were subjected to three-point bending at 8 (A-E), 18 (F-J) and 52 weeks (K-O). Ultimate  
390 strength (A, F, K) and stiffness (B, G, L) (extrinsic) measurements were normalised to cross-sectional  
391 area (E, J, O) to calculate ultimate stress (C, H, M) and elastic modulus (D, I, N) (intrinsic). Blue  
392 bars/triangles = males, orange bars/circles = females. Thin blue and orange bars show differences  
393 between genotypes and thick blue and orange bars show differences between mouse lines. \* = p-  
394 value < 0.05, \*\* = p-value < 0.01 and \*\*\* = p-value < 0.001. Overall significant p-values from two-way  
395 ANOVA tests were <0.001 (genotype) and <0.001 (sex) for F, <0.001 (genotype) and 0.009 (sex) for G,  
396 0.036 (genotype) for H, <0.001 (sex) for I, <0.001 (genotype) and <0.001 (sex) for J, 0.094 (genotype)  
397 and <0.001 (sex) for N, 0.003 (sex) for O, whilst the overall p-values from Kruskal Wallis H tests were  
398  $p < 0.001$  for A, <0.001 for B, 0.018 for D, <0.001 for E.  $n=4$  for all oim groups, except female 18 week  
399 oim/oim and male 18 week J+/+ where  $n=5$ , and female 8 week oim/oim where  $n=6$ .  $n=6$  for all  
400 Col1a2 null groups at 8 weeks and  $n=5$  for all Col1a2 null groups at 18 weeks.  $n=4$  for all Col1a2 null  
401 groups at 52 weeks, except male +/+ where  $n=5$  and male +/- where  $n=6$ .

402

403

#### 404 **Micro-computed tomography bone scans of oim and Col1a2 null mice**

405 To analyse differences in bone structure between genotypes, the proximal tibias from oim and  
406 Col1a2 null mice were analysed by  $\mu$ CT (Fig. 5).

407 There were significant changes in bone volume and architecture in mice (both males and  
408 females) carrying the oim mutation at both 8 weeks and 18 weeks of age, and most of the  
409 differences showed an apparent gene dose effect. In males at 8 weeks, BV/TV was decreased by 42%  
410 in heterozygote mice and 80% in homozygous mice compared to wild-type controls (Fig. 5A), due to  
411 a decrease in both trabecular thickness (Fig. 5B) and trabecular number (Fig. 5D). The decrease in  
412 trabecular thickness and number lead to a 60% increase of trabecular separation in oim/oim  
413 homozygotes (Fig. 5C). In addition, TMD was decreased by 21% in homozygous 8-week-old males  
414 compared to wild-type controls (Fig 5F), and although a similar trend was observed in heterozygote  
415 males, this was not statistically significant. Similar changes were observed in female mice at 8 weeks,  
416 however, the differences tended to be smaller, and the effect of the oim mutation was only  
417 statistically significant for BV/TV and trabecular number (Fig. 5 A,D).

418 At 18 weeks of age, the pattern of the effects of the oim mutation on trabecular bone were  
419 similar to those observed at 8 weeks, however, the differences between WT mice and +/oim and  
420 oim/oim mice were generally smaller. For instance, BV/TV in males was decreased by 50% at 18  
421 weeks (Fig. 5G), compared to 80% at 8 weeks of age (Fig. 5A). There were no differences in tissue  
422 mineral density at 18 weeks of age (Fig. 5L).

423 The effects of Col1a2 deletion on bone volume and architecture were relatively minor, and  
424 almost only observed in male mice at 8 weeks of age. The main difference was a 17% decrease in  
425 BV/TV in homozygote null mice compared to wild-type controls (Fig. 5A), associated with a 11%  
426 decrease in trabecular thickness (Fig. 5B), and a 8% decrease in trabecular number (Fig. 5D). In  
427 addition, male heterozygous null mice showed a 19% increase in TMD at 18 weeks of age (Fig. 5L),  
428 and homozygous null males showed a 22% increase in TMD at 52 weeks of age (Fig. 5R) compared to  
429 wild-type controls. Apparent gene-dosage dependent increases in BV/TV, trabecular number and  
430 connectivity were observed for male mice at 52 weeks.

431

432

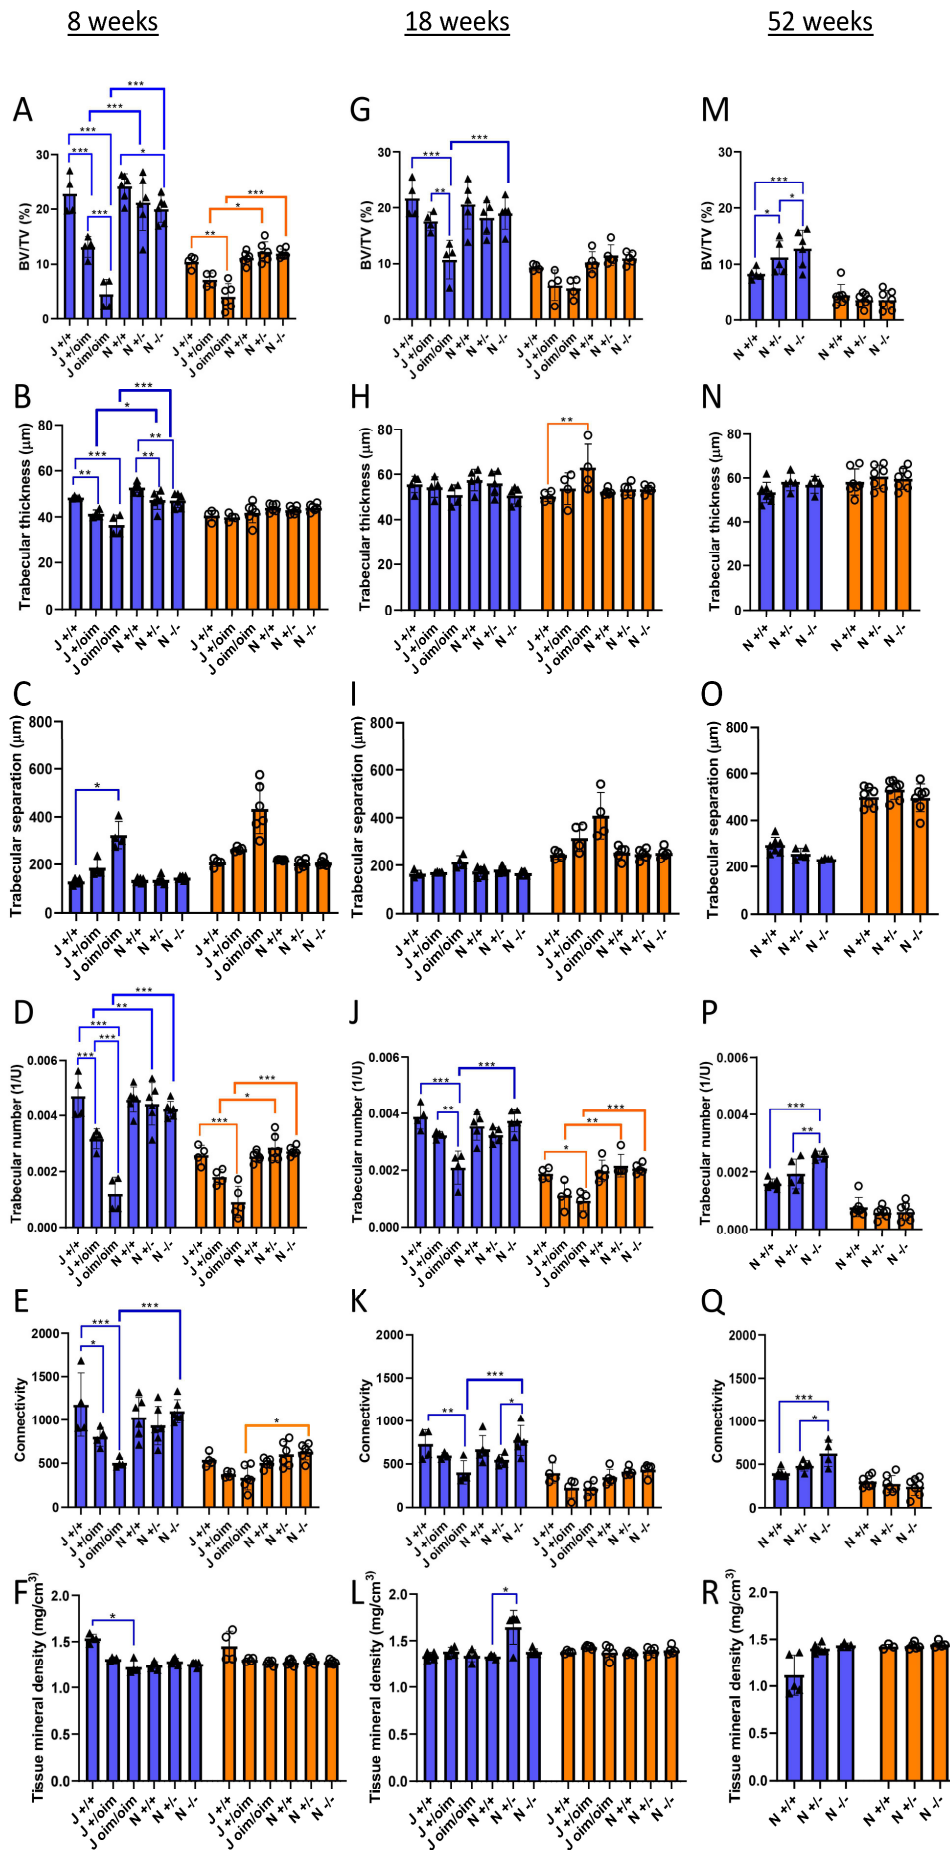



434 **Figure 5. Micro-computed tomography bone scans of oim and Col1a2 null mice.** MicroCT scans  
435 were performed on the knee joints of oim and Col1a2 null mice at 8 (A-F), 18 (G-L) and 52 weeks (M-  
436 R). Reconstruction and analysis of scan files enabled determination of bone volume (A, G, M),  
437 trabecular thickness (B, H, N), trabecular separation (C, I, O), trabecular number (D, J, P), connectivity  
438 (E, K, Q) and bone density (F, L, R). Blue bars/triangles = males, orange bars/circles = females. Thin  
439 blue and orange bars show differences between genotypes and thick blue and orange bars show  
440 differences between mouse lines. \* = p-value < 0.05, \*\* = p-value < 0.01 and \*\*\* = p-value < 0.001.  
441 Overall p-values from two-way ANOVA tests were <0.001 (genotype) and <0.001 (sex) for A, <0.001  
442 (genotype) and <0.001 (sex) for B, <0.001 (genotype) and <0.001 (sex) for D, <0.001 (genotype) and  
443 <0.001 (sex) for E, <0.001 (genotype) and <0.001 (sex) for G, 0.387 (genotype) for H, <0.001  
444 (genotype) and <0.001 (sex) for J, <0.001 (genotype) and <0.001 (sex) for K, 0.004 (genotype) and  
445 <0.001 (sex) for M, <0.001 (genotype) for O, 0.007 (genotype) and <0.001 (sex) for P, 0.075  
446 (genotype) and <0.001 (sex) for Q, and the overall p-values from Kruskal Wallis H tests were <0.001  
447 for C, <0.001 for F, <0.001 for I, 0.014 for L, 0.015 for R. n=4 for all oim groups, except female 8 week  
448 old oim/oim where n=6. n=6 for all Col1a2 null groups at 8 weeks and n=5 for all Col1a2 null groups  
449 at 18. n=7 for all Col1a2 null groups at 52 weeks, except male +/- where n=5 and -/- where n=4.

450

451

#### 452 **Age-related deterioration of Col1a2 null male homozygotes**

453 The tm1b line (Col1a2 null) was maintained on a mild protocol and mice exceeding the mild severity  
454 limited were legally required to be humanely killed. We noted an unexpectedly high loss of male  
455 Col1a2 null homozygotes due to a loss of condition, including weight loss and respiratory difficulties.  
456 A Kaplan-Meier 'survival' analysis was performed on the Col1a2 null mouse line (Fig. 6). All  
457 genotyped mice from this line were included in the analysis up to the age of 12 months, the end  
458 point for all experiments. The majority of genotypes had very few losses throughout the time course,  
459 with no animals lost for female wild-types and heterozygotes and only one animal lost for female  
460 homozygotes, male wild-types and heterozygotes out of a total of 19 mice. In contrast, almost 50%  
461 of male homozygotes were lost over the 12 month experimental period.

462

463

464

465

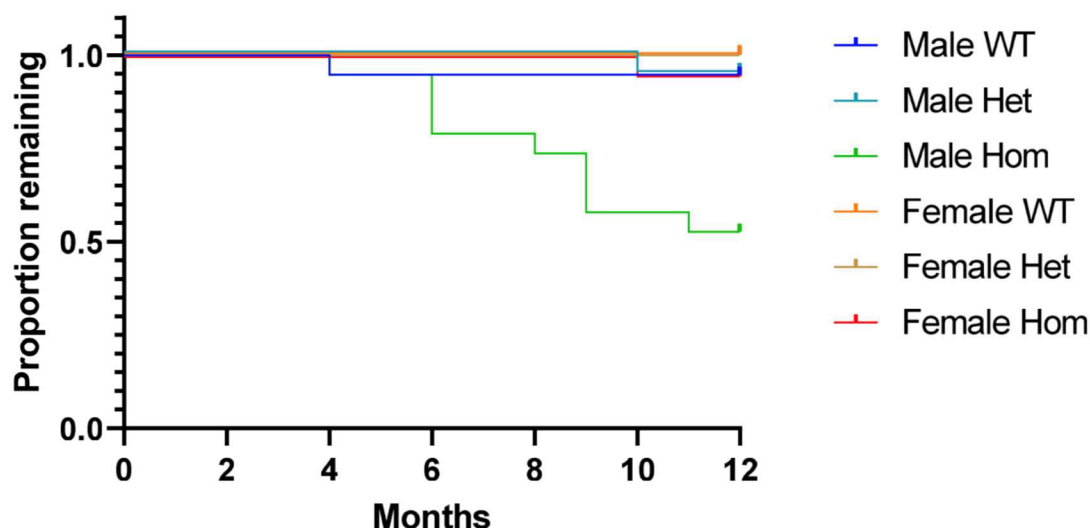

466  
467

468 **Figure 6. Survival analysis for the Col1a2KO mouse line.** A Kaplan-Meier ‘survival’ analysis was  
469 performed on all genotyped mice from the Col1a2 null line up until 12 months (end of experiment).  
470 A log-rank (Mantel-Cox) test was performed which gave an overall p-value of <0.0001 indicating a  
471 significant difference between survival curves. n=19 for all groups.

472  
473

#### 474 **Oim heterozygotes do not down-regulate the mutant allele**

475 We considered that the less severe bone phenotype of oim heterozygotes could be related to a  
476 compensatory down-regulation of mRNA from the oim mutant allele. A custom allelic discrimination  
477 assay indicated that mRNA from both alleles was present in bone tissue from heterozygotes at both  
478 8 (Fig. 7A) and 18 weeks of age (Fig. 7B). Whilst other tissues can be affected in the oim line the  
479 bone phenotype is particularly severe. We therefore determined whether there was compensatory  
480 downregulation of the mutant allele in tendon at 8 weeks (Fig. 7C) and 18 weeks (Fig. 7D), and in  
481 aorta (Fig. 7E), kidney (Fig. 7F), liver (Fig. 7G), or lung (Fig. 7H) at 18 weeks. For all tissues examined,  
482 mRNA from both alleles was present at a close to 50-50% ratio in heterozygotes.

483  
484  
485  
486

487 *Over page:*

488

489 **Figure 7. Allelic discrimination in the oim line.** Allelic discrimination was carried out in bone (A-B)  
490 and tendon (C-D) at 8 (A, C) and 18 weeks (B, D) and in aorta (E), kidney (F), liver (G) and lung (H) at  
491 18 weeks using ROX labelled primer/probes for the wild-type and VIC for the oim allele channels. For  
492 all tissues wild-types displayed little to no VIC signal, whilst homozygotes displayed no ROX signal.  
493 Heterozygotes had approximately intermediate signals in both channels with no systematic  
494 deviations between sexes or tissues. n=4 for all groups except 8 week bone and tendon samples  
495 from male and female oim/oim where n=2-3, 18 week bone and tendon samples from male +/+  
496 where n=5 and female +/oim where n=1, kidney, aorta and lung samples for female +/+ and +/oim  
497 where n=3.

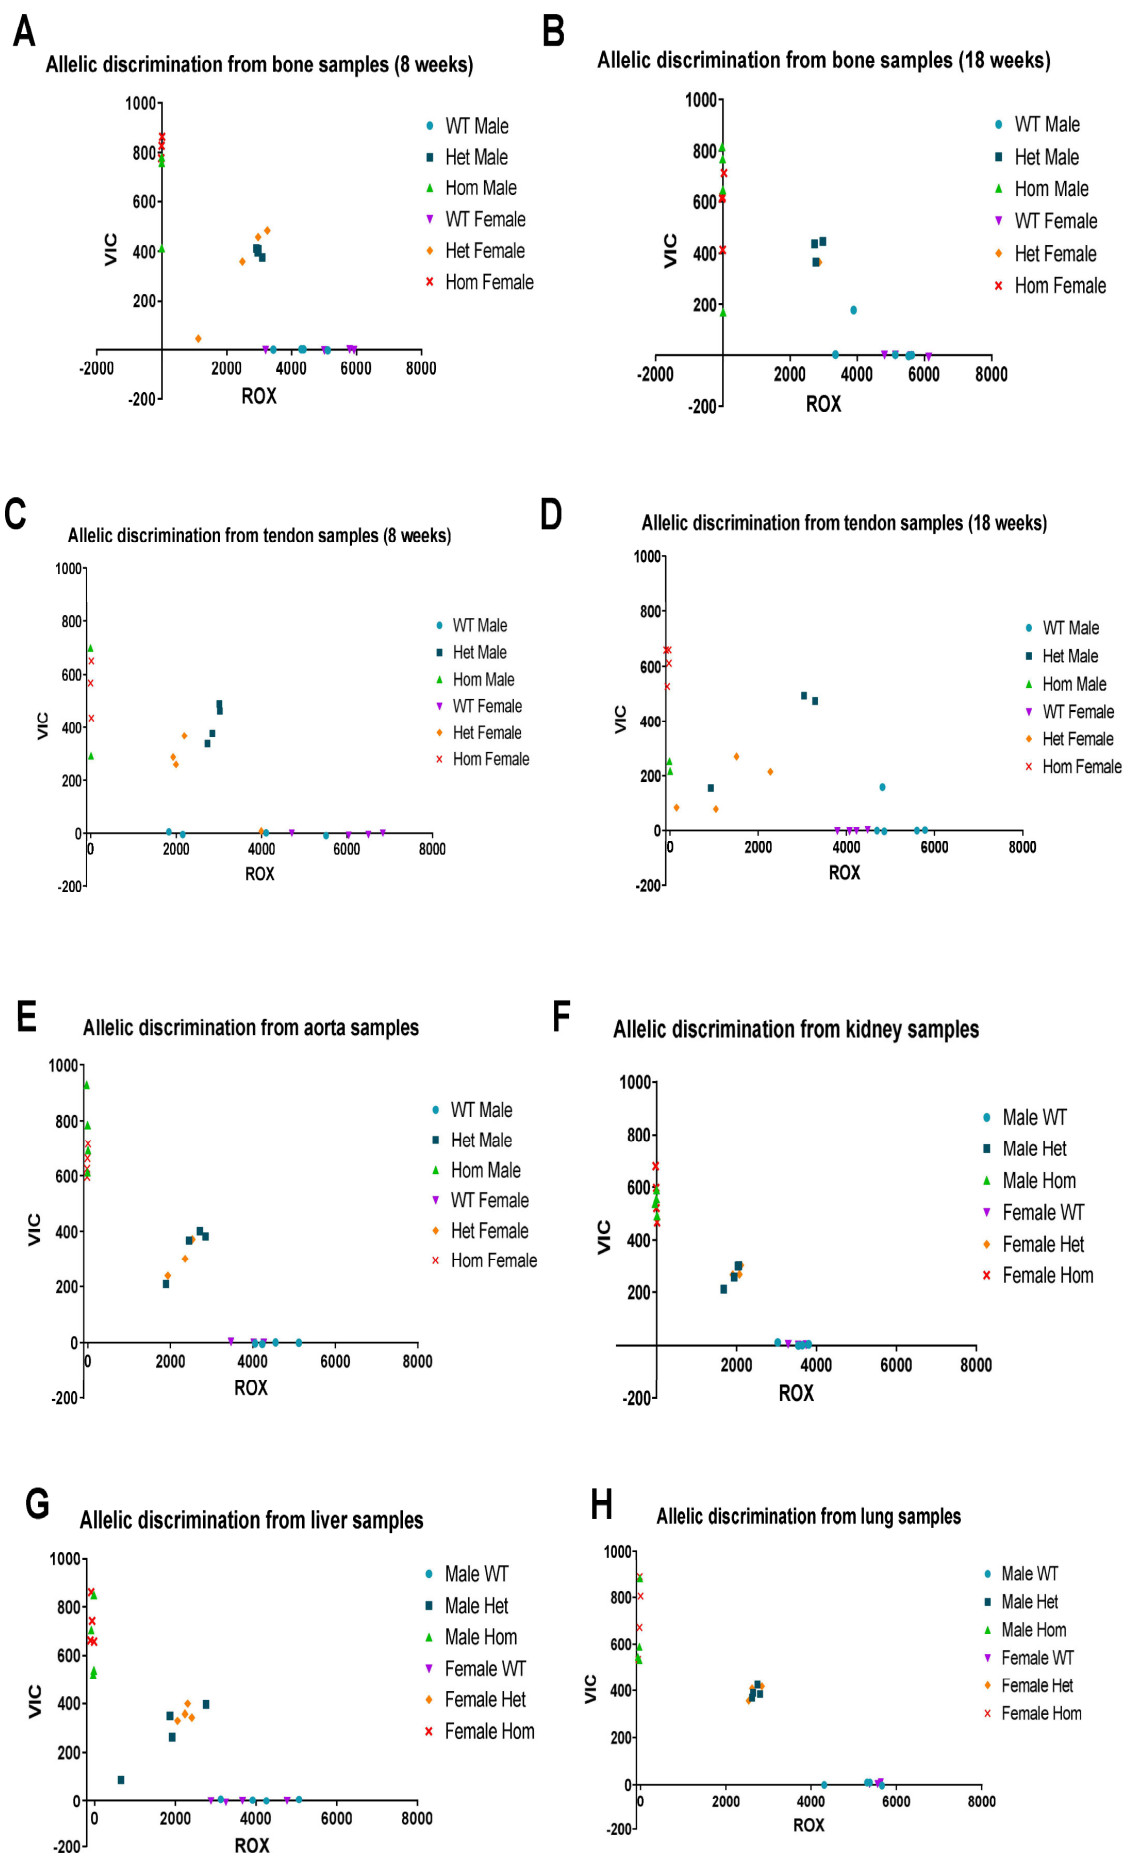

499 **There is a genetic interaction between the oim mutant allele and collagen (I) homotrimer**

500 As the mutant allele is not downregulated in oim heterozygotes, it is feasible that the less severe  
501 phenotype relates to gene dosage; given that heterozygotes have 1 rather than 2 copies of the  
502 mutant allele. To test this hypothesis we crossed the oim and tm1b lines to produce compound  
503 heterozygote offspring, along with heterozygotes of each genotype (Fig. 8A). Compound  
504 heterozygotes contain only one copy of the oim mutant allele but have no wild-type Col1a2 allele so  
505 produce solely homotrimeric  $\alpha 1$  type I collagen.

506 The proximal tibias from 8-week-old oim and Col1a2 null (oim/Col1a2 null) cross line mice  
507 were analysed by  $\mu$ CT (Fig. 8 B-G). Oim/Col1a2 null compound heterozygotes demonstrated a  
508 significantly reduced bone volume (Fig. 8B), trabecular thickness (males only) (Fig. 8C), trabecular  
509 number (Fig. 8E) and an increased trabecular separation (Fig. 8D), compared with wild-types, Col1a2  
510 null heterozygotes and oim heterozygotes. Connectivity was reduced in male compound  
511 heterozygotes compared to Col1a2 null heterozygotes (Fig. 8F). Therefore the phenotype of the  
512 compound heterozygote was more severe than that of the oim heterozygotes, indicating that gene  
513 dosage alone does not determine phenotypic severity.

514 The data for the compound heterozygotes was compared to that of the oim homozygotes  
515 and the Col1a2 null line, all of which produce no heterotrimeric type I collagen (Fig. S1). Oim  
516 homozygotes and compound heterozygotes demonstrated a reduced bone volume (Fig. S1A),  
517 trabecular thickness (males only) (Fig. S1B), trabecular separation (Fig. S1D) and connectivity (males  
518 only) (Fig. S1E), compared to Col1a2 null homozygotes. Trabecular separation was significantly  
519 increased in oim homozygotes compared to Col1a2 null homozygotes and compound heterozygotes  
520 (Fig. S1C). There was also a significant difference between female compound heterozygotes and  
521 Col1a2 null homozygotes. Male oim homozygotes demonstrated reduced BV/TV, trabecular  
522 thickness, trabecular number and connectivity and increased trabecular separation compared to  
523 compound heterozygotes. Fewer differences were seen for females with only an increased  
524 trabecular separation observed in oim homozygotes compared to compound heterozygotes.  
525 Therefore the bone phenotype of the compound heterozygotes was considerably more severe than  
526 the Col1a2 null lacking any mutant  $\alpha 2(I)$  chain, but less severe than the oim homozygotes with two  
527 mutant alleles.

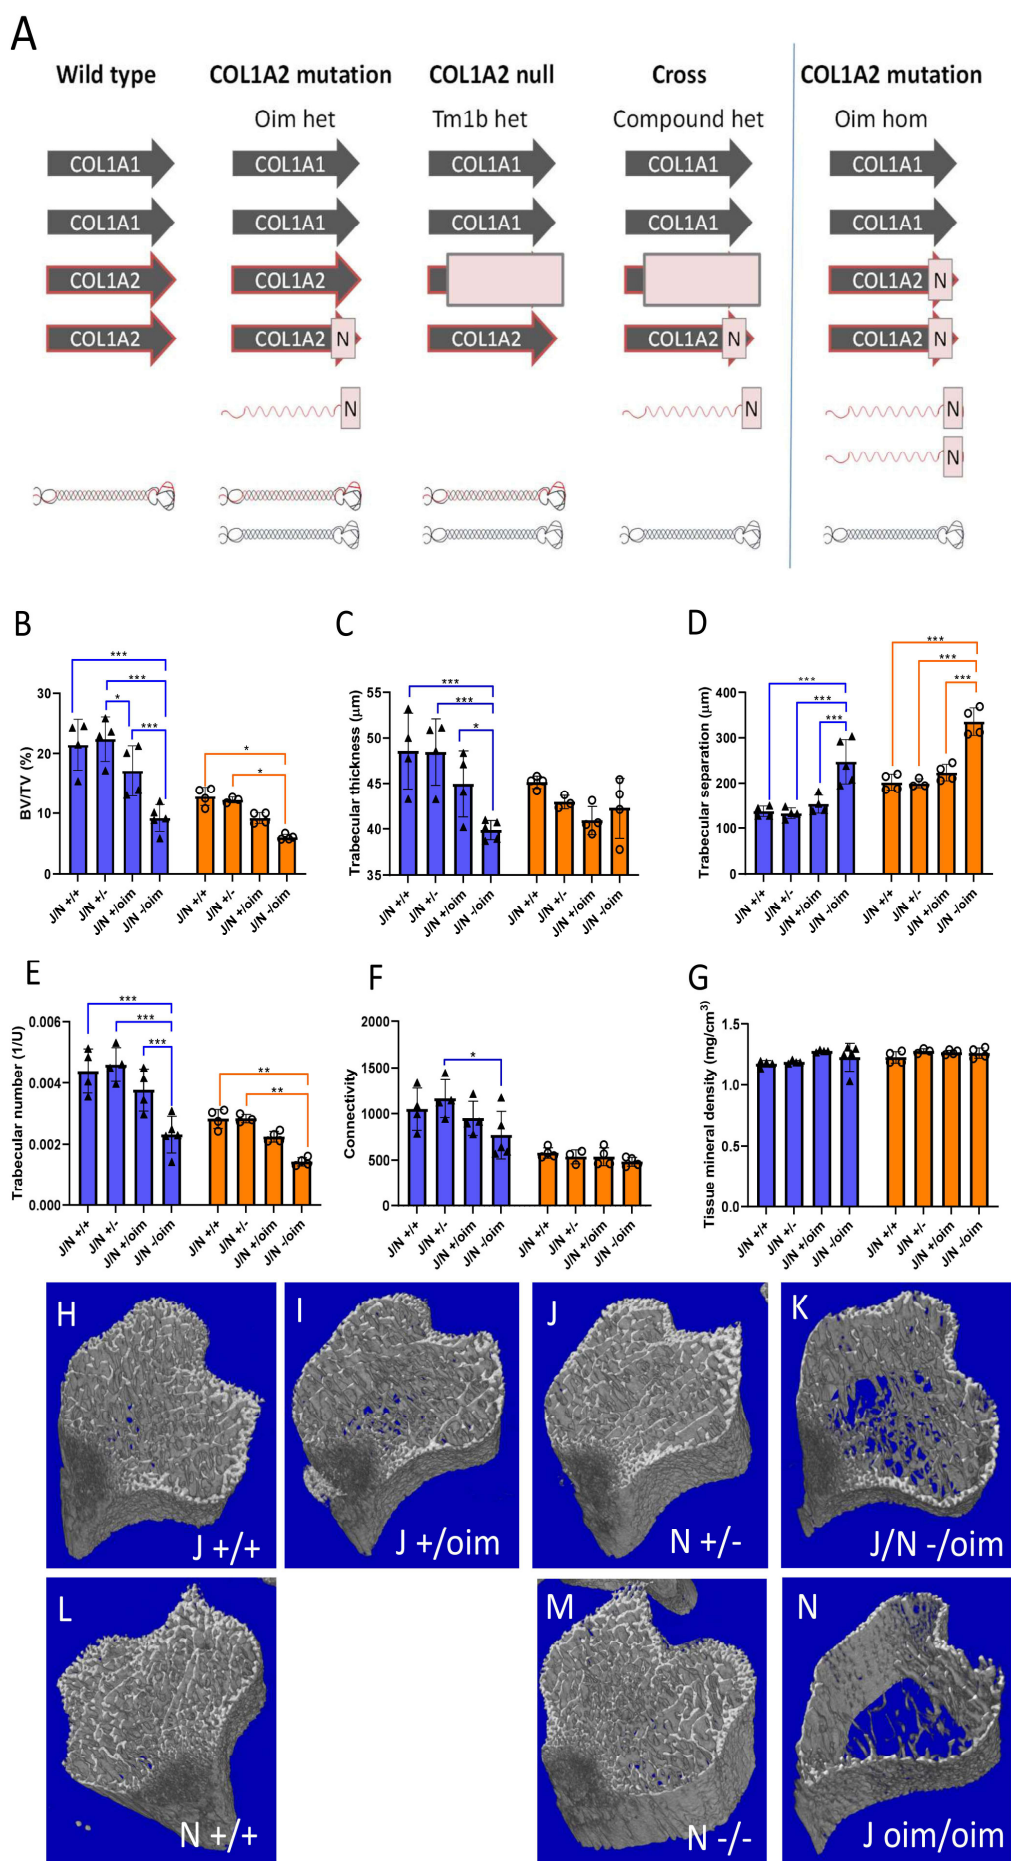

529 **Figure 8. Bone structural properties are impaired in compound heterozygotes as compared to**  
530 **heterozygotes of the oim or Col1a2 null lines.** A: Genetic differences between the heterozygous oim  
531 and Col1a2 null alleles and the compound heterozygous allele, with implications for collagen (I)  
532 protein synthesis. The homozygous oim allele is shown for comparison. Arrows indicate COL1 genes;  
533 N indicates mutation, light red box indicates null allele. Folded heterotrimeric proteins are indicated  
534 in black and red, whilst homotrimers are in black only. The presence of unincorporated mutant  
535 Col1a2 allele is indicated as a red waveform with a mutation (N). B-G: MicroCT scans were  
536 performed on the knee joints of offspring from heterozygous crosses of each line. Reconstruction  
537 and analysis of scan files enabled determination of bone volume (B), trabecular thickness (C),  
538 trabecular separation (D), trabecular number (E), connectivity (F) and bone density (G). H-N:  
539 Representative scan images from wild-types from the oim line (H), oim heterozygotes (I), Col1a2 null  
540 heterozygotes (J), compound heterozygotes (K), wild-types from the Col1a2 null line (L), Col1a2 null  
541 homozygotes (M) and oim homozygotes (N). Bone structural defects are more pronounced in  
542 compound than in oim heterozygotes. Blue bars/triangles = males, orange bars/circles = females.  
543 Blue and orange bars show differences between genotypes. \* = p-value < 0.05 and \*\*\* = p-value  
544 <0.001. Overall p-values from two-way ANOVA tests were <0.001 (genotype) and <0.001 (sex) for B,  
545 <0.001 (genotype) and 0.012 (sex) for C, <0.001 (genotype) and <0.001 (sex) for D, <0.001 (genotype)  
546 and <0.001 (sex) for E, 0.069 (genotype) and <0.001 (sex) for F, and the overall p-value from a  
547 Kruskal Wallis H test was 0.03 for G. n=4 for all groups, except male oim/- where n=5 and female -/+  
548 where n=3.

549  
550  
551  
552  
553  
554  
555  
556  
557  
558  
559  
560  
561  
562  
563  
564  
565  
566  
567  
568  
569  
570  
571

## 572 Discussion

573

574 To determine the contribution of collagen (I) homotrimer to bone fragility, we compared the bone  
575 phenotype of two mouse lines that lack the  $\alpha 2$  chain of type I collagen: the oim mutant, a Col1a2  
576 null and a combination of the lines. After propagating the lines, we measured a difference in  
577 Mendelian inheritance for males from both lines; interestingly this seemed to increase the  
578 proportion of wild-type males whilst decreasing the proportion of heterozygotes. To our knowledge  
579 pre-weaning loss of male heterozygotes has not been reported for either line. Enzymatic  
580 susceptibility assays and differential scanning calorimetry have previously indicated that tail tendon  
581 from heterozygous oim mice contains both heterotrimeric and homotrimeric type I collagen  
582 (Kuznetsova et al., 2003; McBride et al., 1997). Reconstituted fibrils comprising both heterotrimeric  
583 and homotrimeric collagen (I) molecules showed subfibrillar segregation of each trimeric form (Han  
584 et al., 2008). Hence, mixed fibrils in heterozygotes may affect tissue remodelling or mechanics during  
585 development resulting in decreased survival of heterozygotes.

586 Unlike oim homozygotes, we observed no fractures in Col1a2 null homozygotes. Bone  
587 structural parameters and material properties were largely similar between wild-type, heterozygote  
588 and Col1a2 null homozygotes. However, for males there was a decrease in bone volume and  
589 trabecular thickness at 8 weeks and a reduction in ultimate strength in tibia at 18 weeks in  
590 homozygotes as compared with wild-type, paralleling the trend but not the extent of the reduction  
591 observed in oim homozygotes. Our results for the oim line at 8 weeks are in agreement with  
592 previous studies showing a significant reduction in tibial bone volume and trabecular thickness in  
593 oim homozygotes (Ranzoni et al., 2016) and a significant reduction in ultimate strength and stiffness  
594 of the femur (Vanleene et al., 2011).

595 By including sex as a factor in our analyses we noted the decrease in tibial trabecular  
596 thickness and femur stiffness was particular to male homozygotes. Our results for the oim line at 18  
597 weeks were similar to those previously reported for 4 month old mice on the same background  
598 although with some differences relating to the significance or gender/sex dependence of the  
599 differences (Yao et al., 2013). In accordance with previous studies, we found no difference in  
600 intrinsic elastic modulus or ultimate stress in oim homozygotes (Vanleene et al., 2012; Vanleene et  
601 al., 2011; Yao et al., 2013) except for ultimate stress in male 18 week homozygotes. Decreased  
602 ultimate stress was previously reported for 12-14 week oim homozygotes (Bart et al., 2014; Miller et  
603 al., 2007), but not in all studies (Zimmerman et al., 2018). Oim homozygote mice were lighter and  
604 visually smaller than their wild-type and heterozygote littermates, therefore the differences seen in  
605 extrinsic but not intrinsic mechanical properties between oim homozygotes and wild-types could  
606 imply that the increased bone fragility of oim homozygotes is due to the reduced size of these mice.  
607 However, there were few significant differences in bone cross-sectional area between oim  
608 homozygotes and wild-types (only for tibias from 18 week old mice) and microCT analysis indicates  
609 the presence of intrinsic differences in bone structure with reduced cortical and trabecular bone.

610 Col1a2 null homozygotes did not display bone fragility but swollen joints were identified in  
611 males who also displayed age-related deterioration in condition. Human COL1A2 null homozygotes  
612 have cardiac valvular Ehlers-Danlos syndrome (cvEDS) (Guarnieri et al., 2019; Malfait et al., 2006)  
613 hence the age-related deterioration in mice may relate to cardiovascular abnormalities. Indeed the  
614 International Mouse Phenotyping Consortium reports dilated left heart ventricle measured at 12  
615 weeks of age and increased heart weight at 16 weeks in Col1a2 null homozygotes (IMPC).  
616 Cardiovascular abnormalities were however observed in mice of both sexes and cvEDS patients are

617 not solely male. It may be that cardiovascular defects present earlier in male mice due to increased  
618 activity or remain subclinical in females. IMPC also reported a skeletal phenotype for Col1a2 null  
619 male mice with increased (notably not decreased) bone mineral content and density (DEXA, 14  
620 weeks) and “abnormal” femur and tibia morphology (X-ray, 14 weeks). Reported phenotypes change  
621 over time due to continual addition of control samples ,but alterations to body fat in males and  
622 increased circulating alkaline phosphates in both sexes were also listed.

623 A key finding of this study was that the bone phenotype of a single copy of the oim allele  
624 was exacerbated by the absence of heterotrimeric type I collagen; i.e. that oim heterozygotes had a  
625 less severe phenotype than compound oim/null heterozygotes. Notably the phenotype of oim  
626 homozygotes still appeared more severe than that of compound heterozygotes, indicating some  
627 gene dosage effect for the mutant allele. Oim heterozygotes do not down-regulate the mutant allele  
628 (Fig. 7) hence presumably there is no mechanism to detect the oim mutation prior to translation or  
629 trimerization. We observed several significant differences between oim heterozygotes and wild-type  
630 controls, including reduced bone stiffness and increased trabecular separation in tibias from 18  
631 week old female heterozygotes and reduced bone volume in 18 week old males. These results are  
632 contrary to a previous study which reported no significant differences for these parameters in a  
633 similar cohort of mice (Yao et al., 2013). Eight week old male heterozygotes also displayed reduced  
634 bone volume, trabecular thickness and connectivity compared to wild-type controls. In oim  
635 heterozygotes it is unclear if these observed differences in bone parameters as compared to wild-  
636 type controls relate solely to the interaction between the oim mutant allele and the proportion of  
637 homotrimeric collagen (I) that was present, or if the oim allele alone exerts an effect. The genetic  
638 interaction between the oim allele and homotrimeric collagen (I) could relate to the process of  
639 collagen folding and trimerization within the endoplasmic reticulum, or indeed the homotrimeric  
640 collagen (I) could alter cell-matrix interactions to modulate cellular stress responses. Procollagen N-  
641 and C-propeptides, derived from the proteolytic cleavage of procollagen, have been shown to have  
642 intracellular roles in modulating protein synthesis (Hayata et al., 2008; Marongiu et al., 2016;  
643 Oganessian et al., 2006) whilst homotrimeric triple helical regions increased proliferation and  
644 migration as compared to heterotrimeric pepsinised collagen (Makareeva et al., 2010). Hence  
645 homotrimeric forms of collagen fibrils or propeptides have the potential for altered signalling  
646 affecting cellular stress responses. The association of homotrimeric type I collagen with several  
647 common human age-related diseases, in which it is unlikely to predominate structurally, could  
648 therefore relate to altered cellular signalling or cell stress responses.

649 The experiments outlined above demonstrate a genetic interaction between homotrimeric  
650 collagen (I) and the oim mutant allele, suggesting that the presence of heterotrimeric collagen (I) in  
651 oim heterozygotes alleviates the effect of the oim mutant allele. The molecular basis of such  
652 interaction remains to be elucidated.

653

654

## 655 **Author Contributions**

656 KJL: Data curation, Formal Analysis, Investigation, Project administration, Supervision, Visualization,  
657 Writing – original draft, Writing – review & editing; LR: Data curation, Investigation, Visualization;  
658 GBG: Funding acquisition, Methodology, Writing – review & editing; PC: Conceptualization, Funding  
659 acquisition, Writing – review & editing; RA: Funding acquisition, Methodology, Writing – review &  
660 editing; GC: Formal Analysis, Funding acquisition, Writing – review & editing; RVH: Data curation,



661 Investigation, Funding acquisition, Investigation, Methodology, Software, Supervision, Visualization,  
662 Writing – review & editing; EGC-L: Conceptualization, Funding acquisition, Project administration,  
663 Supervision, Visualization, Writing – original draft, Writing – review & editing

664

665

## 666 **Acknowledgements**

667

668 The study was funded by the UK Medical Research Council (MR/R00319X/1). LR was supported by  
669 the Erasmus+ program.

670

671

## 672 **References**

673

- 674 Bailey, A.J., T.J. Sims, and L. Knott. 2002. Phenotypic expression of osteoblast collagen in  
675 osteoarthritic bone: production of type I homotrimer. *Int J Biochem Cell Biol.* 34:176-182.
- 676 Bart, Z.R., M.A. Hammond, and J.M. Wallace. 2014. Multi-scale analysis of bone chemistry,  
677 morphology and mechanics in the oim model of osteogenesis imperfecta. *Connect Tissue*  
678 *Res.* 55 Suppl 1:4-8.
- 679 Brull, D.J., L.J. Murray, C.A. Boreham, S.H. Ralston, H.E. Montgomery, A.M. Gallagher, F.E. McGuigan,  
680 G. Davey Smith, M. Savage, S.E. Humphries, and I.S. Young. 2001. Effect of a COL1A1 Sp1  
681 binding site polymorphism on arterial pulse wave velocity: an index of compliance.  
682 *Hypertension.* 38:444-448.
- 683 Camacho, N.P., L. Hou, T.R. Toledano, W.A. Ilg, C.F. Brayton, C.L. Raggio, L. Root, and A.L. Boskey.  
684 1999. The material basis for reduced mechanical properties in oim mice bones. *J Bone Miner*  
685 *Res.* 14:264-272.
- 686 Canty, E.G., and K.E. Kadler. 2005. Procollagen trafficking, processing and fibrillogenesis. *J Cell Sci.*  
687 118:1341-1353.
- 688 Carleton, S.M., D.J. McBride, W.L. Carson, C.E. Huntington, K.L. Twenter, K.M. Rolwes, C.T.  
689 Winkelmann, J.S. Morris, J.F. Taylor, and C.L. Phillips. 2008. Role of genetic background in  
690 determining phenotypic severity throughout postnatal development and at peak bone mass  
691 in Col1a2 deficient mice (oim). *Bone.* 42:681-694.
- 692 Carriero, A., E.A. Zimmermann, A. Paluszny, S.Y. Tang, H. Bale, B. Busse, T. Alliston, G. Kazakia, R.O.  
693 Ritchie, and S.J. Shefelbine. 2014. How tough is brittle bone? Investigating osteogenesis  
694 imperfecta in mouse bone. *J Bone Miner Res.* 29:1392-1401.
- 695 Chessler, S.D., and P.H. Byers. 1993. BiP binds type I procollagen pro  $\alpha$  chains with mutations in the  
696 carboxyl-terminal propeptide synthesized by cells from patients with osteogenesis  
697 imperfecta. *J Biol Chem.* 268:18226-18233.
- 698 Chipman, S.D., H.O. Sweet, D.J. McBride, Jr., M.T. Davisson, S.C. Marks, Jr., A.R. Shuldiner, R.J.  
699 Wenstrup, D.W. Rowe, and J.R. Shapiro. 1993. Defective pro  $\alpha$  2(I) collagen synthesis in a  
700 recessive mutation in mice: a model of human osteogenesis imperfecta. *PNAS.* 90:1701-  
701 1705.
- 702 DiChiara, A.S., R.C. Li, P.H. Suen, A.S. Hosseini, R.J. Taylor, A.F. Weickhardt, D. Malhotra, D.R.  
703 McCaslin, and M.D. Shoulders. 2018. A cysteine-based molecular code informs collagen C-  
704 propeptide assembly. *Nat Commun.* 9:4206.
- 705 Ehrlich, H.P., H. Brown, and B.S. White. 1982. Evidence for type V and I trimer collagens in  
706 Dupuytren's Contracture palmar fascia. *Biochem Med.* 28:273-284.
- 707 Forlino, A., W.A. Cabral, A.M. Barnes, and J.C. Marini. 2011. New perspectives on osteogenesis  
708 imperfecta. *Nat Rev Endocrinol.* 7:540-557.

- 709 Forlino, A., N.V. Kuznetsova, J.C. Marini, and S. Leikin. 2007. Selective retention and degradation of  
710 molecules with a single mutant  $\alpha 1(I)$  chain in the Brl IV mouse model of OI. *Matrix Biol.*  
711 26:604-614.
- 712 Gioia, R., F. Tonelli, I. Ceppi, M. Biggiogera, S. Leikin, S. Fisher, E. Tenedini, T.A. Yorgan, T. Schinke, K.  
713 Tian, J.M. Schwartz, F. Forte, R. Wagener, S. Villani, A. Rossi, and A. Forlino. 2017. The  
714 chaperone activity of 4PBA ameliorates the skeletal phenotype of Chihuahua, a zebrafish  
715 model for dominant osteogenesis imperfecta. *Hum Mol Genet.* 26:2897-2911.
- 716 Grabner, B., W.J. Landis, P. Roschger, S. Rinnerthaler, H. Peterlik, K. Klaushofer, and P. Fratzl. 2001.  
717 Age- and genotype-dependence of bone material properties in the osteogenesis imperfecta  
718 murine model (oim). *Bone.* 29:453-457.
- 719 Guarnieri, V., S. Morlino, G. Di Stolfo, S. Mastroianno, T. Mazza, and M. Castori. 2019. Cardiac  
720 valvular Ehlers-Danlos syndrome is a well-defined condition due to recessive null variants in  
721 COL1A2. *Am J Med Genet A.* 179:846-851.
- 722 Han, S., E. Makareeva, N.V. Kuznetsova, A.M. DeRidder, M.B. Sutter, W. Losert, C.L. Phillips, R. Visse,  
723 H. Nagase, and S. Leikin. 2010. Molecular mechanism of type I collagen homotrimer  
724 resistance to mammalian collagenases. *J Biol Chem.* 285:22276-22281.
- 725 Han, S., D.J. McBride, W. Losert, and S. Leikin. 2008. Segregation of type I collagen homo- and  
726 heterotrimers in fibrils. *J Mol Biol.* 383:122-132.
- 727 Hayata, T., T. Nakamoto, Y. Ezura, and M. Noda. 2008. Ciz, a transcription factor with a  
728 nucleocytoplasmic shuttling activity, interacts with C-propeptides of type I collagen. *Biochem*  
729 *Biophys Res Commun.* 368:205-210.
- 730 IMPC. International Mouse Phenotyping Consortium: Col1a2.  
731 <https://www.mousephenotype.org/data/genes/MGI:88468>. Date accessed: 8 June 2020.
- 732 Kerns, J.G., P.D. Gikas, K. Buckley, A. Shepperd, H.L. Birch, I. McCarthy, J. Miles, T.W.R. Briggs, R.  
733 Keen, A.W. Parker, P. Matousek, and A.E. Goodship. 2014. Evidence from Raman  
734 Spectroscopy of a Putative Link Between Inherent Bone Matrix Chemistry and Degenerative  
735 Joint Disease. *Arthritis & Rheumatology.* 66:1237-1246.
- 736 Kuznetsova, N.V., D.J. McBride, and S. Leikin. 2003. Changes in thermal stability and microunfold  
737 pattern of collagen helix resulting from the loss of  $\alpha 2(I)$  chain in osteogenesis imperfecta  
738 murine. *J Mol Biol.* 331:191-200.
- 739 Lees, J.F., M. Tasab, and N.J. Bulleid. 1997. Identification of the molecular recognition sequence  
740 which determines the type-specific assembly of procollagen. *EMBO J.* 16:908-916.
- 741 Lisse, T.S., F. Thiele, H. Fuchs, W. Hans, G.K. Przemeck, K. Abe, B. Rathkolb, L. Quintanilla-Martinez,  
742 G. Hoelzlwimmer, M. Helfrich, E. Wolf, S.H. Ralston, and M. Hrabe de Angelis. 2008. ER  
743 stress-mediated apoptosis in a new mouse model of osteogenesis imperfecta. *PLoS Genet.*  
744 4:e7.
- 745 Makareeva, E., N.A. Aviles, and S. Leikin. 2011. Chaperoning osteogenesis: new protein-folding  
746 disease paradigms. *Trends Cell Biol.* 21:168-176.
- 747 Makareeva, E., S. Han, J.C. Vera, D.L. Sackett, K. Holmbeck, C.L. Phillips, R. Visse, H. Nagase, and S.  
748 Leikin. 2010. Carcinomas Contain a Matrix Metalloproteinase-Resistant Isoform of Type I  
749 Collagen Exerting Selective Support to Invasion. *Cancer Res.* 70:4366-4374.
- 750 Malfait, F., S. Symoens, P. Coucke, L. Nunes, S. De Almeida, and A. De Paepe. 2006. Total absence of  
751 the  $\alpha 2(I)$  chain of collagen type I causes a rare form of Ehlers-Danlos syndrome with  
752 hypermobility and propensity to cardiac valvular problems. *J Med Genet.* 43:e36.
- 753 Marongiu, M., M. Deiana, L. Marcia, A. Sbardellati, I. Asunis, A. Meloni, A. Angius, R. Cusano, A. Loi,  
754 F. Crobu, G. Fotia, F. Cucca, D. Schlessinger, and L. Crisponi. 2016. Novel action of FOXL2 as  
755 mediator of Col1a2 gene autoregulation. *Dev Biol.* 416:200-211.
- 756 McBride, D.J., Jr., V. Choe, J.R. Shapiro, and B. Brodsky. 1997. Altered collagen structure in mouse tail  
757 tendon lacking the  $\alpha 2(I)$  chain. *J Mol Biol.* 270:275-284.

- 758 Miller, E., D. Delos, T. Baldini, T.M. Wright, and N. Pleshko Camacho. 2007. Abnormal mineral-matrix  
759 interactions are a significant contributor to fragility in oim/oim bone. *Calcif Tissue Int.*  
760 81:206-214.
- 761 Mirigian, L.S., E. Makareeva, E.L. Mertz, S. Omari, A.M. Roberts-Pilgrim, A.K. Oestreich, C.L. Phillips,  
762 and S. Leikin. 2016. Osteoblast Malfunction Caused by Cell Stress Response to Procollagen  
763 Misfolding in  $\alpha 2(I)$ -G610C Mouse Model of Osteogenesis Imperfecta. *J Bone Miner Res.*  
764 31:1608-1616.
- 765 Misof, K., W.J. Landis, K. Klaushofer, and P. Fratzl. 1997. Collagen from the osteogenesis imperfecta  
766 mouse model (oim) shows reduced resistance against tensile stress. *J Clin Invest.* 100:40-45.
- 767 Nicholls, A.C., G. Osse, H.G. Schloon, H.G. Lenard, S. Deak, J.C. Myers, D.J. Prockop, W.R. Weigel, P.  
768 Fryer, and F.M. Pope. 1984. The clinical features of homozygous  $\alpha 2(I)$  collagen deficient  
769 osteogenesis imperfecta. *J Med Genet.* 21:257-262.
- 770 Nicholls, A.C., F.M. Pope, and H. Schloon. 1979. Biochemical heterogeneity of osteogenesis  
771 imperfecta: New variant. *Lancet.* 1:1193.
- 772 Oganessian, A., S. Au, J.A. Horst, L.C. Holzhausen, A.J. Macy, J.M. Pace, and P. Bornstein. 2006. The  
773 NH2-terminal propeptide of type I procollagen acts intracellularly to modulate cell function.  
774 *J Biol Chem.* 281:38507-38518.
- 775 Pace, J.M., M. Wiese, A.S. Drenguis, N. Kuznetsova, S. Leikin, U. Schwarze, D. Chen, S.H. Mooney, S.  
776 Unger, and P.H. Byers. 2008. Defective C-propeptides of the pro $\alpha 2(I)$  chain of type I  
777 procollagen impede molecular assembly and result in osteogenesis imperfecta. *J Biol Chem.*  
778 283:16061-16067.
- 779 Pfeiffer, B.J., C.L. Franklin, F.H. Hsieh, R.A. Bank, and C.L. Phillips. 2005. A 2(I) collagen deficient oim  
780 mice have altered biomechanical integrity, collagen content, and collagen crosslinking of  
781 their thoracic aorta. *Matrix Biol.* 24:451-458.
- 782 Phillips, C.L., D.A. Bradley, C.L. Schlotzhauer, M. Bergfeld, C. Libreros-Minotta, L.R. Gawenis, J.S.  
783 Morris, L.L. Clarke, and L.S. Hillman. 2000. Oim mice exhibit altered femur and incisor  
784 mineral composition and decreased bone mineral density. *Bone.* 27:219-226.
- 785 Phillips, C.L., B.J. Pfeiffer, A.M. Luger, and C.L. Franklin. 2002. Novel collagen glomerulopathy in a  
786 homotrimeric type I collagen mouse (oim). *Kidney Int.* 62:383-391.
- 787 Philp, A.M., R.L. Collier, L.M. Grover, E.T. Davis, and S.W. Jones. 2017. Resistin promotes the  
788 abnormal Type I collagen phenotype of subchondral bone in obese patients with end stage  
789 hip osteoarthritis. *Scientific reports.* 7:4042.
- 790 Prockop, D.J. 1988. Osteogenesis imperfecta. A model for genetic causes of osteoporosis and  
791 perhaps several other common diseases of connective tissue. *Arthritis Rheum.* 31:1-8.
- 792 Ralston, S.H., A.G. Uitterlinden, M.L. Brandi, S. Balcells, B.L. Langdahl, P. Lips, R. Lorenc, B.  
793 Obermayer-Pietsch, S. Scollen, M. Bustamante, L.B. Husted, A.H. Carey, A. Diez-Perez, A.M.  
794 Dunning, A. Falchetti, E. Karczmarewicz, M. Kruk, J.P. van Leeuwen, J.B. van Meurs, J.  
795 Mangion, F.E. McGuigan, L. Mellibovsky, F. del Monte, H.A. Pols, J. Reeve, D.M. Reid, W.  
796 Renner, F. Rivadeneira, N.M. van Schoor, R.E. Sherlock, and J.P. Ioannidis. 2006. Large-scale  
797 evidence for the effect of the COL1A1 Sp1 polymorphism on osteoporosis outcomes: the  
798 GENOMOS study. *PLoS Med.* 3:e90.
- 799 Ranzoni, A.M., M. Corcelli, K.L. Hau, J.G. Kerns, M. Vanleene, S. Shefelbine, G.N. Jones, D.  
800 Moschidou, B. Dala-Ali, A.E. Goodship, P. De Coppi, T.R. Arnett, and P.V. Guillot. 2016.  
801 Counteracting bone fragility with human amniotic mesenchymal stem cells. *Scientific*  
802 *reports.* 6:39656.
- 803 Rojkind, M., M.A. Giambone, and L. Biempica. 1979. Collagen Types in Normal and Cirrhotic Liver.  
804 *Gastroenterol.* 76:710-719.
- 805 Saban, J., M.A. Zussman, R. Havey, A.G. Patwardhan, G.B. Schneider, and D. King. 1996.  
806 Heterozygous oim mice exhibit a mild form of osteogenesis imperfecta. *Bone.* 19:575-579.

- 807 Sharma, U., L. Carrique, S. Vadon-Le Goff, N. Mariano, R.N. Georges, F. Delolme, P. Koivunen, J.  
808 Myllyharju, C. Moali, N. Aghajari, and D.J. Hulmes. 2017. Structural basis of homo- and  
809 heterotrimerization of collagen I. *Nat Commun.* 8:14671.
- 810 Simon, M.M., S. Greenaway, J.K. White, H. Fuchs, V. Gailus-Durner, S. Wells, T. Sorg, K. Wong, E.  
811 Bedu, E.J. Cartwright, R. Dacquin, S. Djebali, J. Estabel, J. Graw, N.J. Ingham, I.J. Jackson, A.  
812 Lengeling, S. Mandillo, J. Marvel, H. Meziane, F. Preitner, O. Puk, M. Roux, D.J. Adams, S.  
813 Atkins, A. Ayadi, L. Becker, A. Blake, D. Brooker, H. Cater, M.F. Champy, R. Combe, P.  
814 Danecek, A. di Fenza, H. Gates, A.K. Gerdin, E. Golini, J.M. Hancock, W. Hans, S.M. Holter, T.  
815 Hough, P. Jurdic, T.M. Keane, H. Morgan, W. Muller, F. Neff, G. Nicholson, B. Pasche, L.A.  
816 Roberson, J. Rozman, M. Sanderson, L. Santos, M. Selloum, C. Shannon, A. Southwell, G.P.  
817 Tocchini-Valentini, V.E. Vancollie, H. Westerberg, W. Wurst, M. Zi, B. Yalcin, R. Ramirez-Solis,  
818 K.P. Steel, A.M. Mallon, M.H. de Angelis, Y. Herval, and S.D. Brown. 2013. A comparative  
819 phenotypic and genomic analysis of C57BL/6J and C57BL/6N mouse strains. *Genome Biol.*  
820 14:R82.
- 821 Sims, T.J., C.A. Miles, A.J. Bailey, and N.P. Camacho. 2003. Properties of collagen in OIM mouse  
822 tissues. *Connect Tissue Res.* 44 Suppl 1:202-205.
- 823 Skarnes, W.C., B. Rosen, A.P. West, M. Koutsourakis, W. Bushell, V. Iyer, A.O. Mujica, M. Thomas, J.  
824 Harrow, T. Cox, D. Jackson, J. Severin, P. Biggs, J. Fu, M. Nefedov, P.J. de Jong, A.F. Stewart,  
825 and A. Bradley. 2011. A conditional knockout resource for the genome-wide study of mouse  
826 gene function. *Nature.* 474:337-342.
- 827 Sykes, B., B. Puddle, M. Francis, and R. Smith. 1976. The estimation of two collagens from human  
828 dermis by interrupted gel electrophoresis. *Biochem Biophys Res Commun.* 72:1472-1480.
- 829 Vanleene, M., A. Porter, P.-V. Guillot, A. Boyde, M. Oyen, and S. Shefelbine. 2012. Ultra-structural  
830 defects cause low bone matrix stiffness despite high mineralization in osteogenesis  
831 imperfecta mice. *Bone.* 50:1317-1323.
- 832 Vanleene, M., Z. Saldanha, K.L. Cloyd, G. Jell, G. Bou-Gharios, J.H. Bassett, G.R. Williams, N.M. Fisk,  
833 M.L. Oyen, M.M. Stevens, P.V. Guillot, and S.J. Shefelbine. 2011. Transplantation of human  
834 fetal blood stem cells in the osteogenesis imperfecta mouse leads to improvement in  
835 multiscale tissue properties. *Blood.* 117:1053-1060.
- 836 Vouyouka, A.G., B.J. Pfeiffer, T.K. Liem, T.A. Taylor, J. Mudaliar, and C.L. Phillips. 2001. The role of  
837 type I collagen in aortic wall strength with a homotrimeric. *J Vasc Surg.* 33:1263-1270.
- 838 Yao, X., S.M. Carleton, A.D. Kettle, J. Melander, C.L. Phillips, and Y. Wang. 2013. Gender-dependence  
839 of bone structure and properties in adult osteogenesis imperfecta murine model. *Ann*  
840 *Biomed Eng.* 41:1139-1149.
- 841 Zhong, B., D. Huang, K. Ma, X. Deng, D. Shi, F. Wu, and Z. Shao. 2017. Association of COL1A1  
842 rs1800012 polymorphism with musculoskeletal degenerative diseases: a meta-analysis.  
843 *Oncotarget.* 8:75488-75499.
- 844 Zimmerman, S.M., M.E. Heard-Lipsmeyer, M. Dimori, J.D. Thostenson, E.M. Mannen, C.A. O'Brien,  
845 and R. Morello. 2018. Loss of RANKL in osteocytes dramatically increases cancellous bone  
846 mass in the osteogenesis imperfecta mouse (oim). *Bone Rep.* 9:61-73.

847  
848  
849  
850  
851  
852  
853  
854  
855  
856

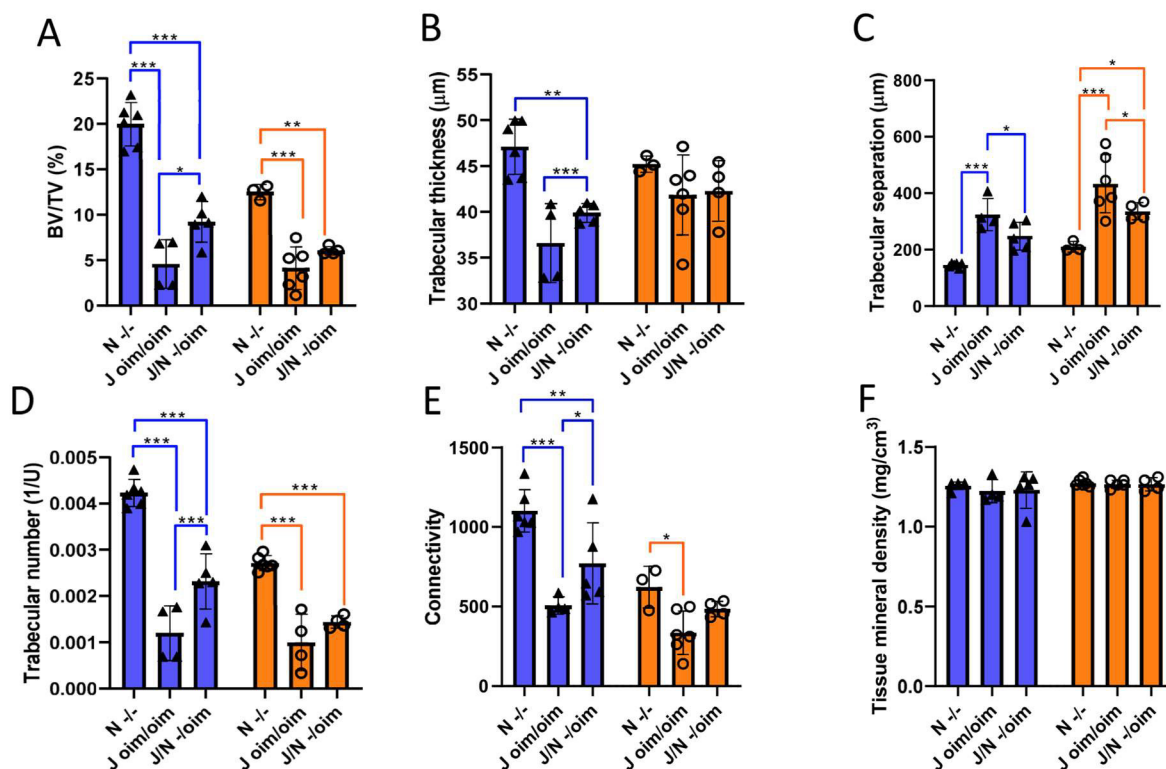

857  
858

859 **Figure S1. Bone structural properties in compound heterozygotes are less severe than Col1a2 null**  
860 **homozygotes.** Bone volume (A), trabecular thickness (B), trabecular separation (C), trabecular  
861 number (D), connectivity (E) and bone density (F) data were compared for Col1a2 null homozygotes  
862 (-/-), oim homozygotes (oim/oim) and compound heterozygotes (-/oim). Blue bars/triangles = males,  
863 orange bars/circles = females. Blue and orange bars show differences between genotypes. \* = p-  
864 value < 0.05, \*\* = p-value < 0.01 and \*\*\* = p-value < 0.001. The overall p-values from two-way  
865 ANOVA tests were < 0.001 (genotype) and < 0.001 (sex) for A, < 0.001 (genotype) for B, < 0.001  
866 (genotype) and < 0.001 (sex) for C, < 0.001 (genotype) and < 0.001 (sex) for D, < 0.001 (genotype) and  
867 < 0.001 (sex) for E. n=4 for all groups, except male oim/- where n=5 and female oim/oim and -/- and  
868 male -/- where n=6.  
869
